# Supplementary material for: Design and synthesis of imidazolinium salts derived from (l)-valine. Investigation of their potential in chiral molecular recognition
Source: Royal Society of Chemistry journal article supplement (doi:10.1039/b402368d), 2004-01-01
Supplement: b402368d.doc [file b402368d.doc]

Design and synthesis of imidazolium salt derived from (*L*)-Valine. Investigation of their potential in Chiral Molecular Recognition.

Hervé Clavier, Loïse Boulanger, Nicolas Audic, Loïc Toupet, Marc Mauduit* and Jean-Claude Guillemin*

H. Clavier, L. Boulanger, N. Audic, Dr. M. Mauduit, Dr. J.C. Guillemin

UMR CNRS 6052, Ecole Nationale Supérieure de Chimie, Institut de Chimie de Rennes, 35700 Rennes (France)

Fax : 33 (0)2 23 23 81 08

E-mail : [marc.mauduit@ensc-rennes.fr](mailto:marc.mauduit@ensc-rennes.fr)

L. Toupet, UMR CNRS 6626, Université de Rennes 1, 35700 Rennes (France)

**General.** 1H (400 MHz), 13C (100 MHz), 31P (162 MHz) and 19F (376.5 MHz) NMR spectra were recorded on a Bruker ARX400 spectrometer with complete proton decoupling for nucleus other than 1H. Chemical shifts are reported in ppm from tetramethylsilane with the solvent resonance as the internal standard (CDCl3, 1H:  7.27 ppm, 13C: 77.0 ppm, CD2Cl2, 1H: 5.31 ppm, 13C: 53.7 ppm and (CD3)2CO: 1H: 2.05 ppm, 13C: 205.1 ppm). Data are reported as follows: chemical shift ( in ppm, multiplicity (s = singlet, d = doublet, t = triplet, q = quadruplet, sept = septuplet, hept = heptuplet, bd = broad, m = multiplet), coupling constants (Hz), integration and attribution. High-resolution mass spectra (HRMS) were recorded at the Centre Régional de Mesures Physiques de l’Ouest (CRMPO), Université de Rennes 1 on a Micromass ZABSpecTOF instrument. Melting points were measured on a heating microscope Reichert and were uncorrected. Optical rotations were recorded using a polarimeter Perkin-Elmer 341.

**Materials.** All non-aqueous reactions were performed under an argon atmosphere using oven-dried glassware. Toluene was distilled from sodium metal under nitrogen. Tetrahydrofuran and diethyl ether were distilled from sodium metal/benzophenone ketyl under nitrogen. Dichloromethane, methanol and N-methylmorpholine were distilled from calcium hydride under nitrogen. The 2N anhydrous HCl/solution was prepared by addition, at 0°C, of acetyl chloride to dry methanol. All others chemical reagents and solvents were obtained from commercial sources and used without further purification. Analytical TLC were performed on Merck silica gel 60F254 plates, and visualized under UV-light. Chromatographic purifications were performed on a column with 230-400 mesh silica gel (Merck 9385) using the indicated solvent system.

**[1-(2-tert-Butyl-phenylcarbamoyl)-2-methyl-propyl]-carbamic acid tert-butyl ester :**

To a solution of BOC-*L*-Valine **1** (2.37 g, 10 mmol) in dry THF (50 mL) was added *N*-methylmorpholine (1.16 mL, 10.5 mmol, 1.05 equiv.). The mixture was cooled to -15°C then *iso*butyl chloroformate (1.37 mL, 10.5 mmol, 1.05 equiv.) was added dropwise. After 30 min stirring, 2-*tert*-butylaniline (1.64 mL, 10.5 mmol, 1.05 equiv.) was added, and the resulting solution was stirred for 48h at room temperature. After evaporation of the solvent, the residue was dissolved in AcOEt and washed successively with saturated NaHCO3 solution, 0.1N HCl solution and brine. The organic layer was dried over MgSO4, filtered and concentrated *in vacuo*. The resulting solid was purified by washing with cold pentane to afford the amide as a white solid (2.76 g, 79 %).

**Mp** = 143°C (pentane).

**[]D20** = -49.2 (c = 1 in chloroform).

**1H NMR** (400 MHz, CDCl3): = 7.98 (s, 1H, ArNH), 7.67-7.14 (m, 4H, 4CHar), 5.02 (bd s, 1H, NH) 4.14 (dd, *J*(H,H) = 5 and 9 Hz, 1H, 1CH), 2.47 (m, 1H, 1CH), 1.47 (s, 9H, 3CH3), 1.41 (s, 9H, 3CH3), 1.07 (d, *J*(H,H) = 7 Hz, 3H, CH3), 0.99 (d, *J*(H,H) = 7 Hz, 3H, CH3).

**13C NMR** (100 MHz, CDCl3): = 170.0, 155.9, 134.93 (2C), 126.8, 126.5 (2C), 126.0, 80.4, 60.9, 34.4, 30.6 (3C), 29.9, 28.3 (3C), 19.6 (2C).

**HRMS** (EI, M+), calcd for C20H32N2O3: 348.2412, found: 348.2413.

**N1-(2-tert-Butyl-phenyl)-3-methyl-butane-1,2-diamine (2):**

To a solution of amide (3.48 g, 10 mmol) in dry methanol (40 mL) was added dropwise a 2N anhydrous HCl/methanol solution (50 mL, 100 mmol, 10 equiv.) at 0°C. The mixture was warmed to room temperature and stirred overnight. After evaporation of the solvent, the resulting salt was dissolved in water and treated by 1N NaOH solution to reach a basic pH. The aqueous layer was saturated with sodium chloride and extracted with dichloromethane. The combined organic layers were dried over MgSO4 and concentrated *in vacuo* to afford the corresponding free amine as an anamorphous solid which was directly dissolved in dry THF and slowly added to a suspension of LiAlH4 (2.28 g, 60 mmol, 6 equiv.) in dry THF at 0°C. The resulting mixture was heated to reflux and stirred for 48h. After cooling to 0°C, water and 15% NaOH solution were added dropwise and the resulting solid material was removed by filtration. The filtrate was concentrated *in vacuo* and the residue was purified by flash chromatography (CH2Cl2/methanol 95/5) to afford the diamine **2** as yellow oil (1.8 g, 78%, two steps).

**[]D20** = +12.8 (c = 1 in chloroform).

**1H NMR** (400 MHz, CDCl3): = 7.28 (dd, *J*(H,H) = 1.5 and 8 Hz, 1H, 1CHar), 7.16 (dt, *J*(H,H) = 1.5 and 8 Hz, 1H, 1CHar), 6.82 (m, 2H, 2CHar), 4.73 (bd s, 1H, NH), 3.32 (d, *J*(H,H) = 10 Hz, 1H, 1CH), 2.99 (m, 2H, 1CH2), 1.74 (hept, *J*(H,H) = 7 Hz, 1H, 1CH), 1.48 (s, 9H, 3CH3), 1.19 (bd s, 2H, NH2), 1.03 (d, *J*(H,H) = 7 Hz, 3H, CH3), 1.01 (d, *J*(H,H) = 7 Hz, 3H, CH3).

**13C NMR** (100 MHz, CDCl3): = 146.9, 133.4, 127.0, 126.1, 116.6, 111.5, 56.3, 48.2, 34.2, 32.9, 29.8 (3C), 19.4, 18.0.

**HRMS** (EI, M+), calcd for C15H26N2: 234.2096, found: 234.2098.

**1-(2-tert-Butyl-phenyl)-4-isopropyl-4,5-dihydro-1*H*-imidazole (3):**

To a solution of diamine **2** (5 mmol) in dry diethyl ether (25 mL) was added dropwise, at 0°C, a 2N anhydrous HCl/methanol solution (2.5 mL, 5mmol, 1 equiv.). A white precipitate was immediately formed. After 10 min. stirring, the solvent was evaporated to afford the corresponding chlorhydrate of diamine in quantitative yield. The salt was dissolved in dry toluene (15 mL) , trimethylorthoformate (2.75 ml, 25 mmol, 5 equiv.) was added and the mixture was heated to 90°C for 12h. After cooling to room temperature, dichloromethane (100 mL) and 1N NaOH aq. solution (60mL) were added. The organic layer was washed with brine, dried over MgSO4 and concentrated *in vacuo*. The residue was purified by flash chromatography (CH2Cl2/methanol 95/5) to afford the imidazole **3** as colorless needles (1.05 g, 86%, two steps).

**Mp** = 43-45°C (AcOEt).

**[]D20** = -12.6 (c = 1 in chloroform).

**1H NMR** (400 MHz, CDCl3): = 7.46-7.43 (m, 1H, 1CHar), 7.26-7.22 (m, 2H, 2CHar), 7.04-7.02 (m, 1H, 1CHar), 6.81 (d, *J*(H,H) = 2 Hz, 1H, 1CH), 3.94 (dt, *J*(H,H) = 2 and 10 Hz, 1H, 1CH), 3.68 (t, *J*(H,H) = 10 Hz, 1H, 1CH), 3.19 (t, *J*(H,H) = 10 Hz, 1H, 1CH), 1.87 (hept, *J*(H,H) = 7 Hz, 1H, 1CH), 1.41 (s, 9H, 3CH3), 1.10 (d, *J*(H,H) = 7 Hz, 3H, CH3), 0.97 (d, *J*(H,H) = 7 Hz, 3H, CH3).

**13C NMR** (100 MHz, CDCl3): = 156.8, 149.1, 141.9, 129.6, 127.8, 127.5, 127.3, 73.2, 58.2, 35.4, 33.1, 31.3 (3C), 19.5, 18.8.

**HRMS** (EI, M+), calcd for C16H24N2: 244.1939, found: 244.1923

**3-(2-tert-Butyl-phenyl)-5-isopropyl-1-methyl-d3-4,5-dihydro-3*H*-imidazol-1-ium hexafluoro phosphate (4a):**

Imidazole **3** (1.2 g, 5 mmol) was dissolved in acetone (5 mL) and iodomethane (375 L, 6 mmol, 1.2 equiv.) was added and the reaction mixture was stirred at room temperature for 2h. The reaction mixture was concentrated to dryness and the white residue dissolved in dry acetone. KPF6 (1.1 g, 6 mmol, 1.2 equiv.) was added at room temperature. After 30 min. stirring, the solvent was evaporated under reduced pressure; the residue was dissolved in dichloromethane and washed with brine. The organic layer was dried over MgSO4 and concentrated *in vacuo*. Purification by flash chromatography (CH2Cl2/acetone 3/1) afforded the imidazolium salt **4a** as a white solid (1.91 g, 94%, two steps).

**Mp** = 136-138°C (AcOEt/pentane).

**[]D20** = -1.6 (c = 1 in chloroform).

**1H NMR** (400 MHz, CDCl3): = 7.89 (s, 1H, 1CH), 7.51 (d, *J*(H,H) = 8 Hz, 1H, 1CHar), 7.40 (m, 1H, 1CHar), 7.28 (m, 2H, 2CHar), 4.52 (dt, *J*(H,H) = 4 and 11 Hz, 1H, 1CH), 4.25 (t, *J*(H,H) = 12 Hz, 1H, 1CH), 3.93 (t, *J*(H,H) = 11 Hz, 1H, 1CH), 3.30 (s, 3H, 1CH3), 2.38 (hept, *J*(H,H) = 4 Hz, 1H, 1CH), 1.38 (s, 9H, 3CH3), 1.03 (d, *J*(H,H) = 7 Hz, 3H, CH3), 1.00 (d, *J*(H,H) = 7 Hz, 3H, CH3).

**13C NMR** (100 MHz, CDCl3): = 159.1, 147.3, 134.4, 130.6, 130.3, 128.7, 128.3, 67.1, 55.3, 35.7, 31.9 (3C), 26.8, 25.6, 18.0, 14.6.

**19F NMR** (376.5 MHz, CDCl3): = -72.7 (d, *J*(F,P) = 712.8 Hz).

**31P NMR** (162 MHz, CDCl3): =-143.2 (sept, *J*(P,F) = 712.8 Hz).

**HRMS** (FAB), calcd for C+: C17H24D3N2: 262.2363, found:262.2367; calcd for 2C+,PF6-: C34H48D6F6N4P: 669.4367, found: 669.4377.

**3-(2-tert-Butyl-phenyl)-5-isopropyl-1-octyl-4,5-dihydro-3*H*-imidazol-1-ium hexafluoro phosphate (4b):**

Imidazole **3** (1.2 g, 5 mmol) was dissolved in acetone (5 mL) and 1-bromooctane (1.73 mL, 10 mmol, 2 equiv.) was added and the reaction mixture was stirred at reflux for 48h. KPF6 (1.1 g, 6 mmol, 1.2 equiv.) was added at room temperature. After 30 min. stirring, the solvent was evaporated under reduced pressure; the residue was dissolved in dichloromethane and washed with brine. The organic layer was dried over MgSO4 and concentrated *in vacuo*. Purification by flash chromatography (CH2Cl2/acetone 3/1) afforded the imidazolium salt **4b** as a limpid oil (2.23 g, 70%, two steps).

**[]D20** = +6.0 (c = 1.08 in chloroform).

**1H NMR** (400 MHz, CDCl3): = 7.88 (s, 1H, 1CH), 7.52 (dd, *J*(H,H) = 1 and 8 Hz, 1H, 1CHar), 7.40 (dt, *J*(H,H) = 1 and 8 Hz, 1H, 1CHar), 7.29 (dt, *J*(H,H) = 1 and 8 Hz, 1H, 1CHar), 7.20 (d, *J*(H,H) = 8 Hz, 1H, 1CHar), 4.56 (dt, *J*(H,H) = 3 and 11 Hz, 1H, 1CH), 4.31 (t, *J*(H,H) = 12 Hz, 1H, 1CH), 3.91 (t, *J*(H,H) = 11 Hz, 1H, 1CH), 3.76 (m, 1H, 1CH), 3.46 (m, 1H, 1CH), 2.35 (hept, *J*(H,H) = 3 Hz, 1H, 1CH), 1.70 (m, 2H, 1CH2), 1.38 (s, 9H, 3CH3),1.35-1.25 (m, 10H, 5CH2), 1.05 (d, *J*(H,H) = 7 Hz, 3H, CH3), 0.99 (d, *J*(H,H) = 7 Hz, 3H, CH3), 0.87 (m, 3H, CH3).

**13C NMR** (100 MHz, CDCl3): = 158.0, 147.1, 134.0, 130.7, 130.0, 128.7, 128.3, 64.8, 54.7, 46.2, 35.7, 31.9, 31.6, 29.0, 28.8, 27.1, 26.8, 26.3, 22.5, 17.8, 14.4, 14.0.

**19F NMR** (376.5 MHz, CDCl3): = -72.9 (d, *J*(F,P) = 712.8 Hz).

**31P NMR** (162 MHz, CDCl3): = -143.2 (sept, *J*(P,F) = 712.8 Hz).

**3-(2-tert-Butyl-phenyl)-1-(2-hydroxy-ethyl)-5-isopropyl-4,5-dihydro-3H-imidazol-1-ium bis(trifluoromethylsulfonyl)imide (4c):**

Imidazole **3** (1.2 g, 5 mmol) was dissolved in acetone (5 mL) and 2-bromoethanol (705 L, 10 mmol, 2 equiv.) was added and the reaction mixture was stirred at reflux for 48h. After being cooled to room temperature, LiNTf2 (1.7 g, 6 mmol, 1.2 equiv.) was added at room temperature. After 30 min. stirring, the solvent was evaporated under reduced pressure; the residue was dissolved in dichloromethane and washed with brine. The organic layer was dried over MgSO4 and concentrated *in vacuo*. Purification by flash chromatography (CH2Cl2/acetone 3/1) afforded the imidazolium salt **4c** as a yellow oil (1.75 g, 62%, two steps).

**[]D20** = +16.8 (c = 1 in chloroform).

**1H NMR** (400 MHz, CDCl3): = 8.08 (s, 1H, 1CH), 7.55 (dd, *J*(H,H) = 1 and 7 Hz, 1H, 1CHar), 7.43 (dt, *J*(H,H) = 1 and 7 Hz, 1H, 1CHar), 7.32 (dt, *J*(H,H) = 1 and 7 Hz, 1H, 1CHar), 7.18 (d, *J*(H,H) = 7 Hz, 1H, 1CHar), 4.62 (dt, *J*(H,H) = 2 and 12 Hz, 1H, 1CH), 4.30 (t, *J*(H,H) = 12 Hz, 1H, 1CH), 3.95 (dt, *J*(H,H) = 1 and 11 Hz, 1H, 1CH), 3.90-3.80 (m, 3H, 1CH2 and 1CH), 3.60-3.51 (m, 1H, 1CH), 3.26 (bd s, 1H, OH), 2.39 (hept, *J*(H,H) = 3 Hz, 1H, 1CH), 1.39 (s, 9H, 3CH3), 1.07 (d, *J*(H,H) = 7 Hz, 1H, 1CH3), 1.01 (d, *J*(H,H) = 7 Hz, 1H, 1CH3).

**13C NMR** (100 MHz, CDCl3): = 159.2, 147.4, 134.1, 130.7, 129.5, 128.8, 128.1, 119.1 (q, *J*(C,F) = 321.2 Hz), 65.0, 57.3, 54.8, 47.7, 35.6, 31.7 (3C), 26.7, 17.7, 14.4.

**19F NMR** (376.5 MHz, CDCl3): = -79.9.

**HRMS** (FAB), calcd for C+: C18H29N2O: 289.2280, found: 289.2280.

**3-(2-tert-Butyl-phenyl)-1-(3-hydroxy-propyl)-5-isopropyl-4,5-dihydro-3*H*-imidazol-1-ium hexafluoro phosphate (4d):**

Imidazole **3** (1.2 g, 5 mmol) was dissolved in acetone (5 mL) and 3-iodo-1-propanol (960 L, 10 mmol, 2 equiv.) was added and the reaction mixture was stirred at reflux for 12h. After being cooled to room temperature, KPF6 (1.1 g, 6 mmol, 1.2 equiv.) was added at room temperature. After 1h stirring, the solvent was evaporated under reduced pressure; the residue was dissolved in dichloromethane and washed with brine. The organic layer was dried over MgSO4 and concentrated *in vacuo*. Purification by flash chromatography (CH2Cl2/acetone 3/1) afforded the imidazolium salt **4d** as a white solid (1.34 g, 60%, two steps).

**Mp** = 88-90°C (AcOEt).

**[]D20** = +14.3 (c = 1 in chloroform).

**1H NMR** (400 MHz, CD2Cl2): = 7.95 (s, 1H, 1CH), 7.58 (dd, *J*(H,H) = 2 and 7 Hz, 1H, 1CHar), 7.45 (dt, *J*(H,H) = 1 and 7 Hz, 1H, 1CHar), 7.34 (dt, *J*(H,H) = 1 and 7 Hz, 1H, 1CHar), 7.16 (dd, *J*(H,H) = 1 and 8 Hz, 1H, 1CHar), 4.60 (dt, *J*(H,H) = 3 and 11 Hz, 1H, 1CH), 4.28 (t, *J*(H,H) = 12 Hz, 1H, 1CH), 3.93 (t, *J*(H,H) = 11 Hz, 1H, 1CH), 3.90 (m, 1H, 1CH), 3.77 (m, 2H, 1CH2), 3.59 (m, 1H, 1CH), 2.39 (hept, *J*(H,H) = 4 Hz, 1H, 1CH), 1.99-1.91 (m, 2H, 1CH2), 1.39 (s, 9H, 3CH3), 1.04 (d, *J*(H,H) = 8 Hz, 1H, 1CH3), 1.00 (d, *J*(H,H) = 8 Hz, 1H, 1CH3).

**13C NMR** (100 MHz, CD2Cl2): = 158.9, 147.8, 134.5, 131.0, 130.1, 129.3, 128.4, 65.2, 60.0, 55.3, 44.4, 35.9, 31.9, 28.9, 26.9, 18.0, 14.5.

**19F NMR** (376.5 MHz, CD2Cl2): = -73.0 (d, *J*(F,P) = 711.1 Hz).

**31P NMR** (162 MHz, CD2Cl2): = -143.3 (sept, *J*(P,F) = 711.1 Hz).

**3-(2-tert-Butyl-phenyl)-1-(8-hydroxy-octyl)-5-isopropyl-4,5-dihydro-3*H*-imidazol-1-ium hexafluoro phosphate (4e):**

Imidazole **3** (1.2 g, 5 mmol) was dissolved in acetone (5 mL) and 8-bromo-1-octanol (1.71 mL, 10 mmol, 2 equiv.) was added and the reaction mixture was stirred at reflux for 72h. After being cooled to room temperature, KPF6 (1.1 g, 6 mmol, 1.2 equiv.) was added at room temperature. After 2h stirring, the solvent was evaporated under reduced pressure; the residue was dissolved in dichloromethane and washed with brine. The organic layer was dried over MgSO4 and concentrated *in vacuo*. Purification by flash chromatography (CH2Cl2/acetone 3/1) afforded the imidazolium salt **4e** as a white solid (1.26 g, 50%, two steps).

**[]D20** = +1.7 (c = 1.05 in chloroform).

**1H NMR** (400 MHz, CD2Cl2): = 7.93 (s, 1H, 1CH), 7.59 (dd, *J*(H,H) = 1 and 8 Hz, 1H, 1CHar), 7.46 (dt, *J*(H,H) = 1 and 8 Hz, 1H, 1CHar), 7.35 (dt, *J*(H,H) = 1 and 8 Hz, 1H, 1CHar), 7.17 (d, *J*(H,H) = 8 Hz, 1H, 1CHar), 4.49 (dt, *J*(H,H) = 3 and 11 Hz, 1H, 1CH), 4.29 (t, *J*(H,H) = 12 Hz, 1H, 1CH), 3.95 (t, *J*(H,H) = 12 Hz, 1H, 1CH), 3.70 (m, 1H, 1CH), 3.56 (m, 2H, 1CH2), 3.48 (m, 1H, 1CH), 2.37 (hept, *J*(H,H) = 4 Hz, 1H, 1CH), 1.78-1.63 (m, 2H, 1CH2), 1.55-1.47 (m, 2H, 1CH2) 1.39 (s, 9H, 3CH3), 1.39-1.30 (m, 8H, 4CH2), 1.05 (d, *J*(H,H) = 7 Hz, 1H, 1CH3), 0.99 (d, *J*(H,H) = 7 Hz, 1H, 1CH3).

**13C NMR** (100 MHz, CD2Cl2): = 158.2, 147.6, 134.3, 131.1, 130.0, 129.3, 128.4, 65.1, 62.8, 55.0, 36.0, 32.8, 32.0, 29.3, 29.0, 27.3, 27.0, 26.4, 25.7, 17.9, 14.4.

**19F NMR** (376.5 MHz, CD2Cl2): = -72.9 (d, *J*(F,P) = 712.8 Hz).

**31P NMR** (162 MHz, CD2Cl2): = -143.2 (sept, *J*(P,F) = 712.8 Hz).

**Representative procedure for NMR Experiment.**

**Without 18C6:** 12.5 mg of (*Rac*)-potassium-2-methoxy-2-(trifluoromethyl)phenylacetate **5** and imidazolium salt **4** (3.3 equiv.) were dissolved in 0.4 mL of acetone *d6* and the spectrum was recorded. Recovery of imidazolium salt can be realised after dilution in dichloromethane following by repeating washing with water. The organic layer was then dried over MgSO4 and concentrated *in vacuo* to afford the pure imidazolium salt without any trace of Mosher salt.

**With 18C6**: the Mosher salt **5** was previously dissolved in 0.4 mL of CD2Cl2 in presence of 12.1 mg (1 equiv.) of crown ether 18C6, then imidazolium salt **4** (3.3 equiv.) was introduced and the spectrum was recorded.

1H NMR CDCl3

13C NMR CDCl3

13C NMR CDCl3

1H NMR CDCl3

13C NMR CDCl3

1H NMR CDCl3

1H NMR CDCl3

13C NMR CDCl3

19F NMR CDCl3

1H NMR CD2Cl2

13C NMR CD2Cl2

19F NMR CD2Cl2

31P NMR CD2Cl2

1H NMR CD2Cl2

13C NMR CD2Cl2

19F NMR CD2Cl2

31P NMR CD2Cl2


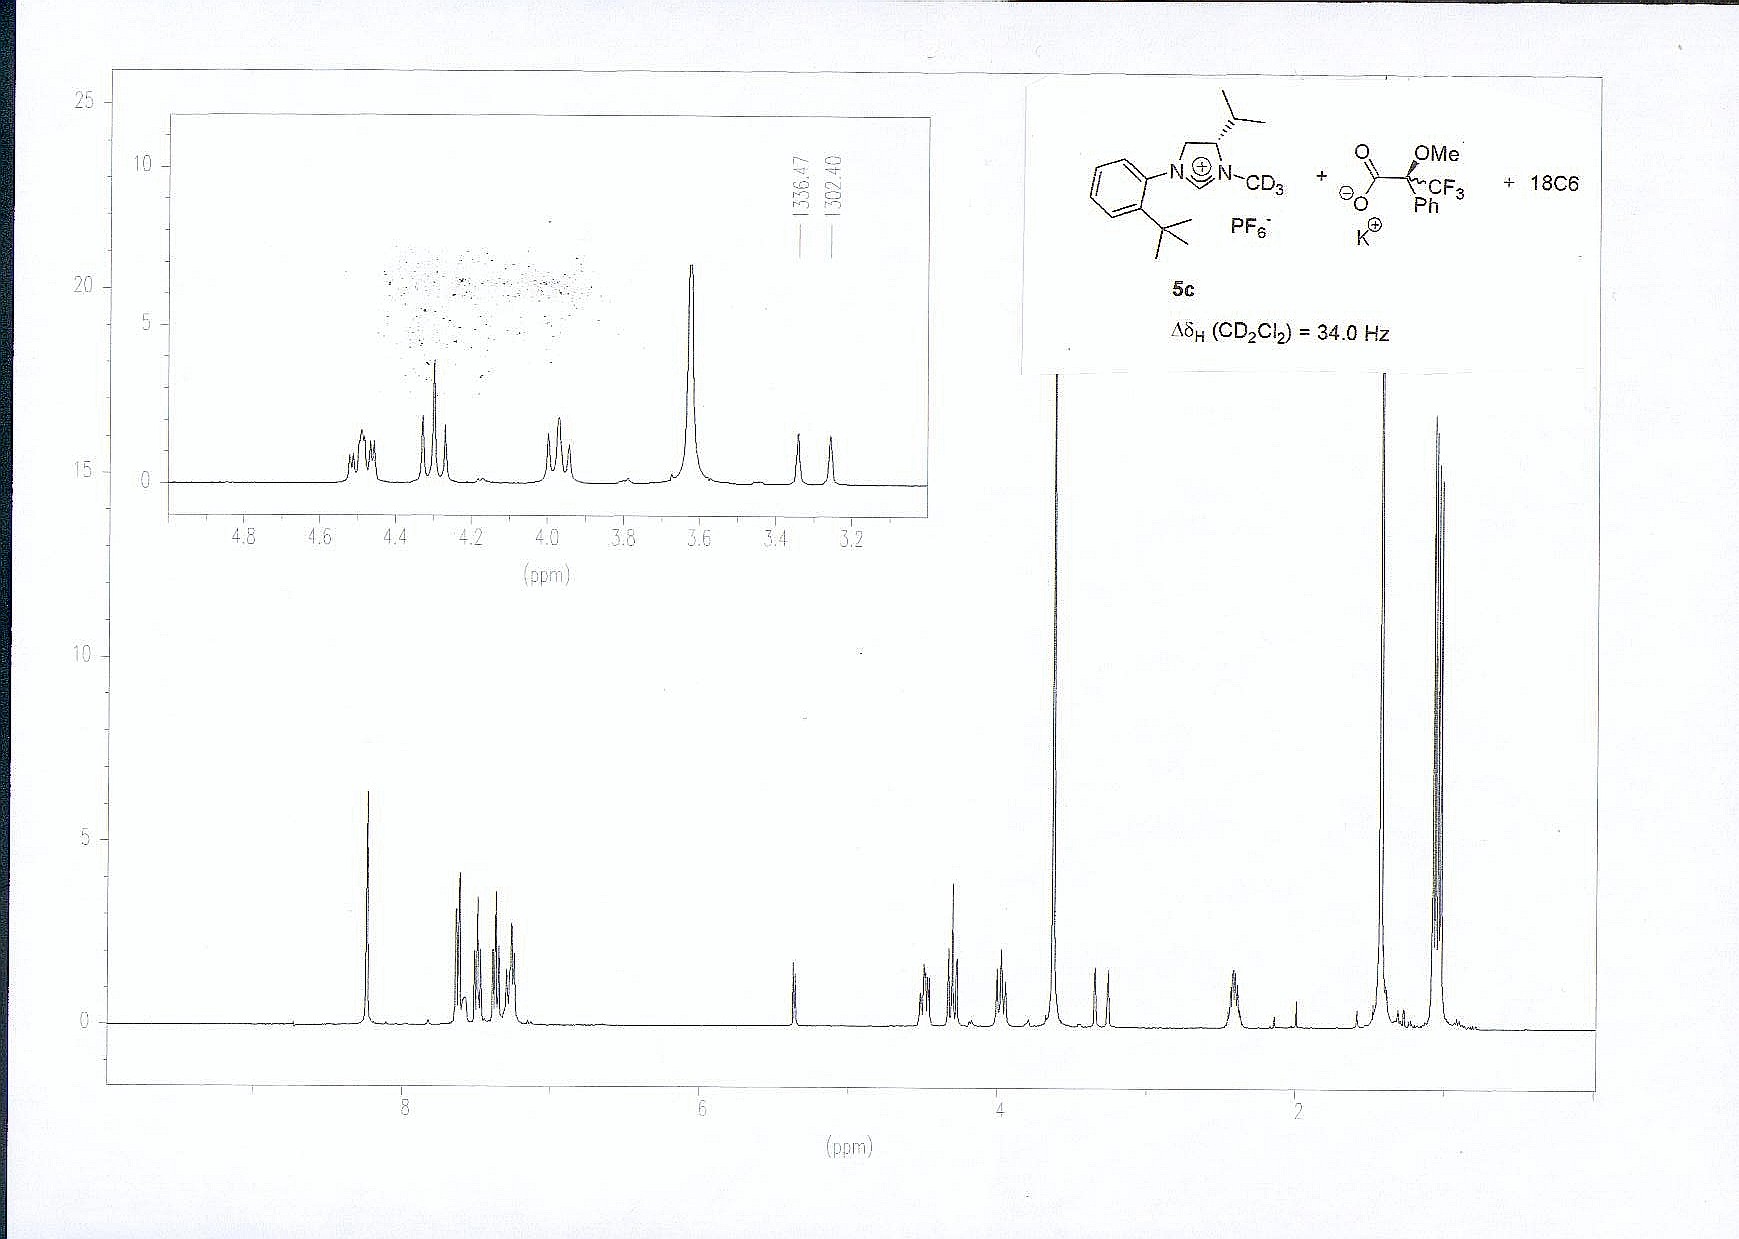


**4a**


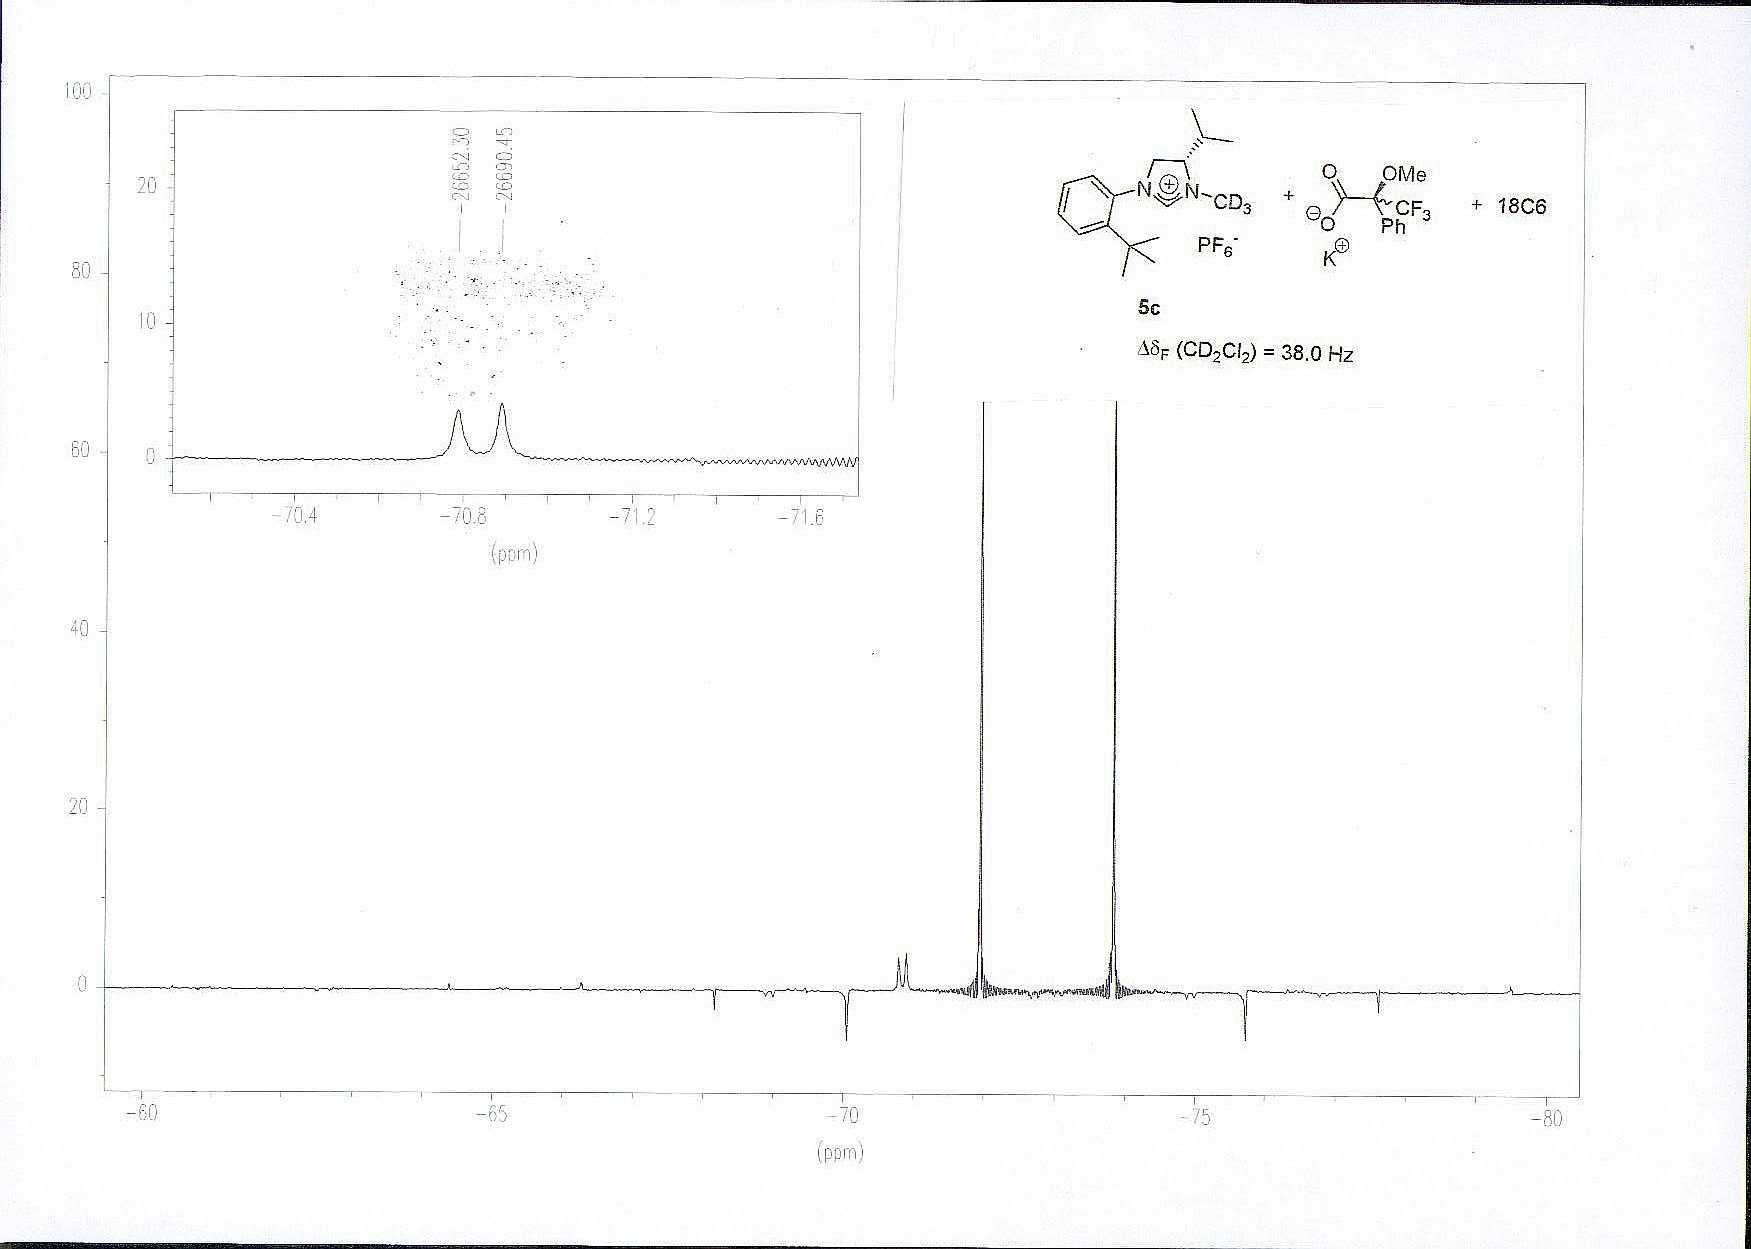


**4a**


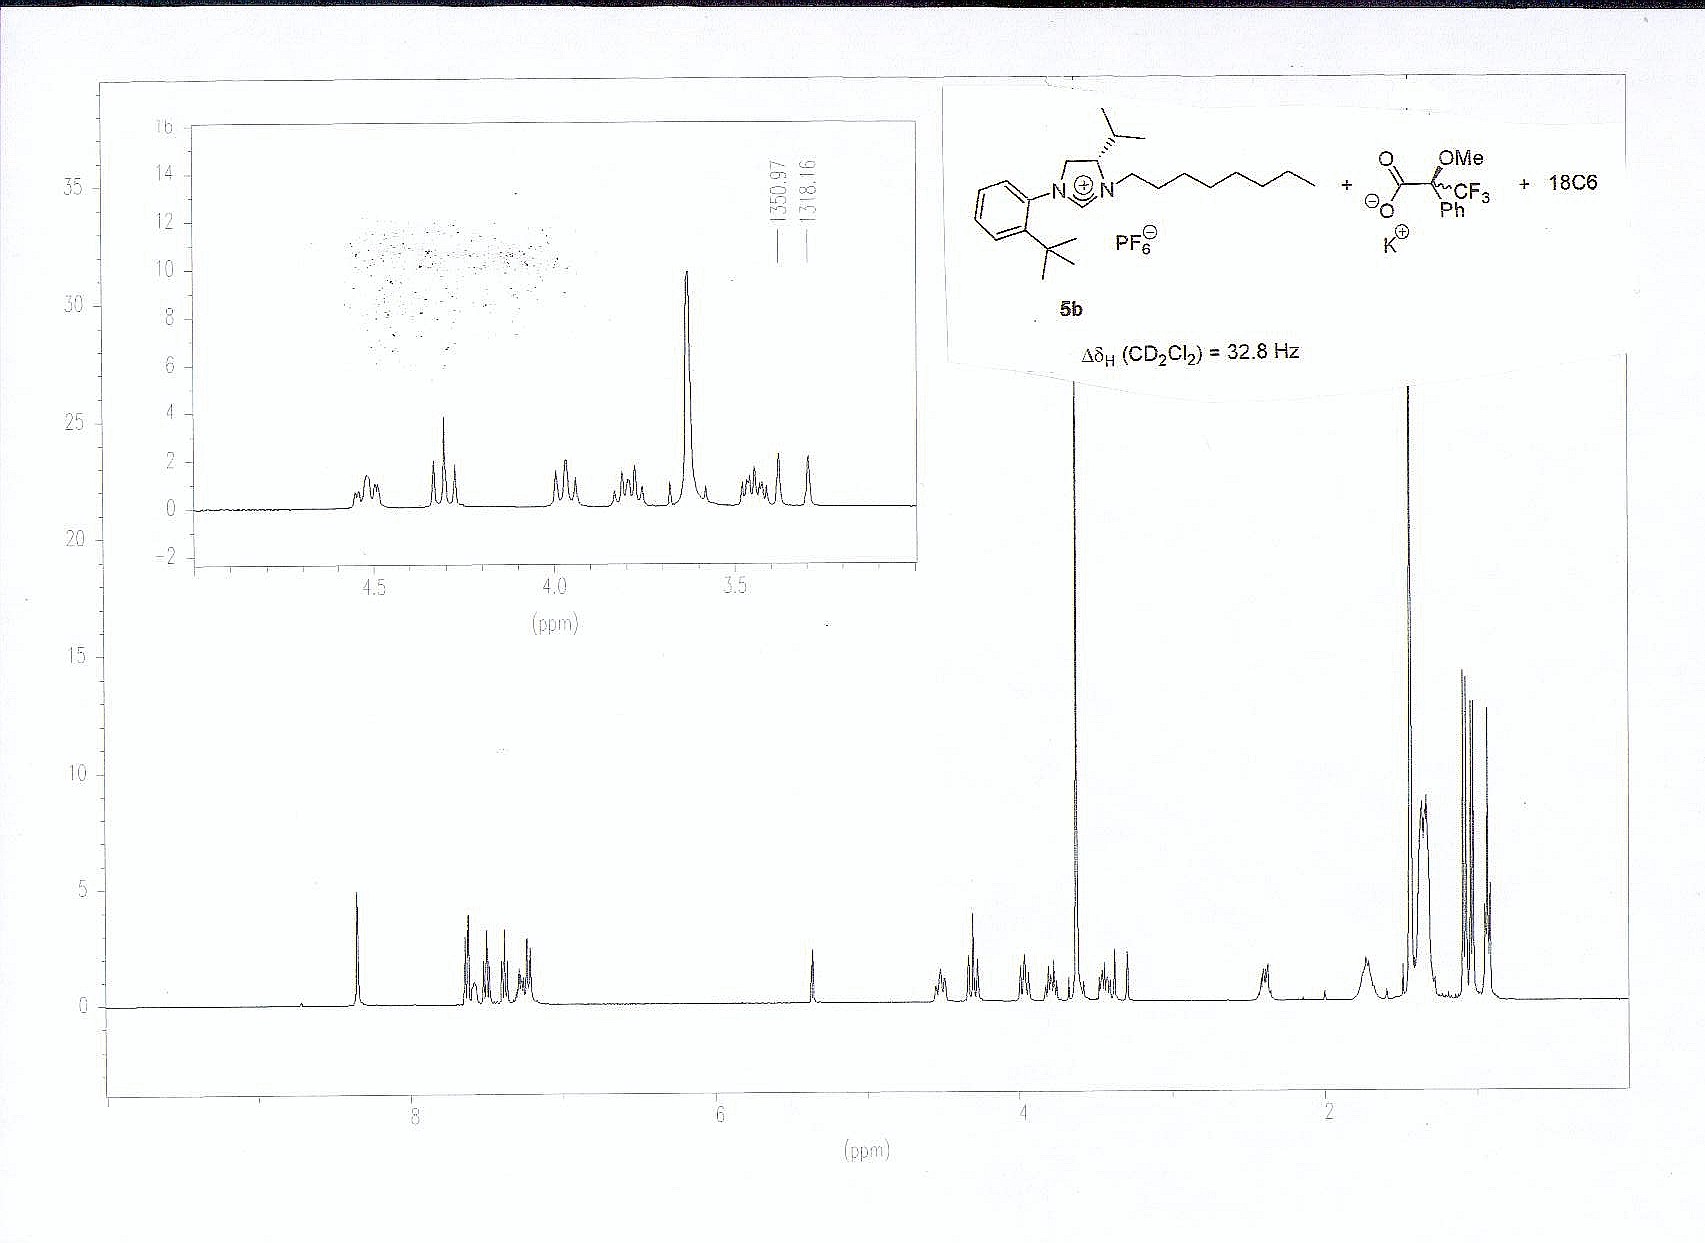


**4b**

**4b**


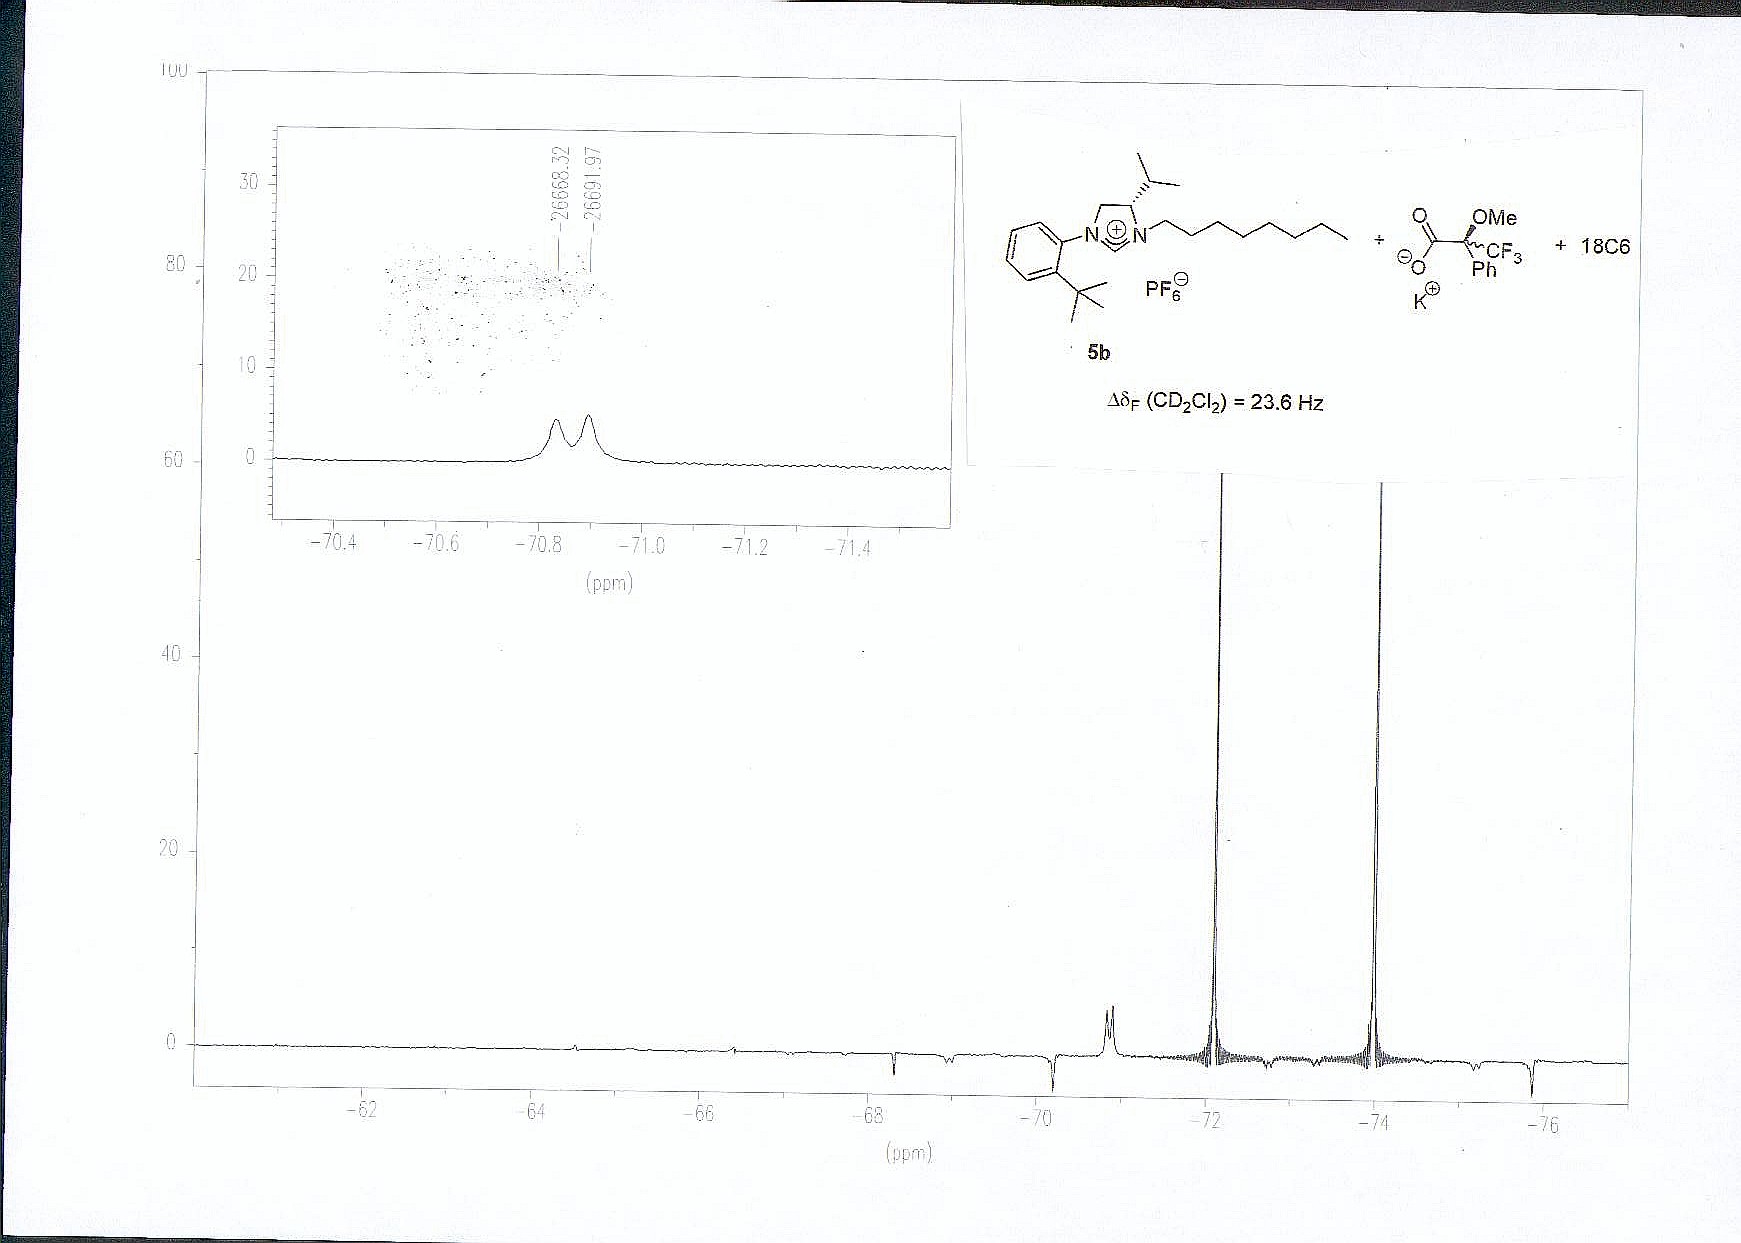


**4b**


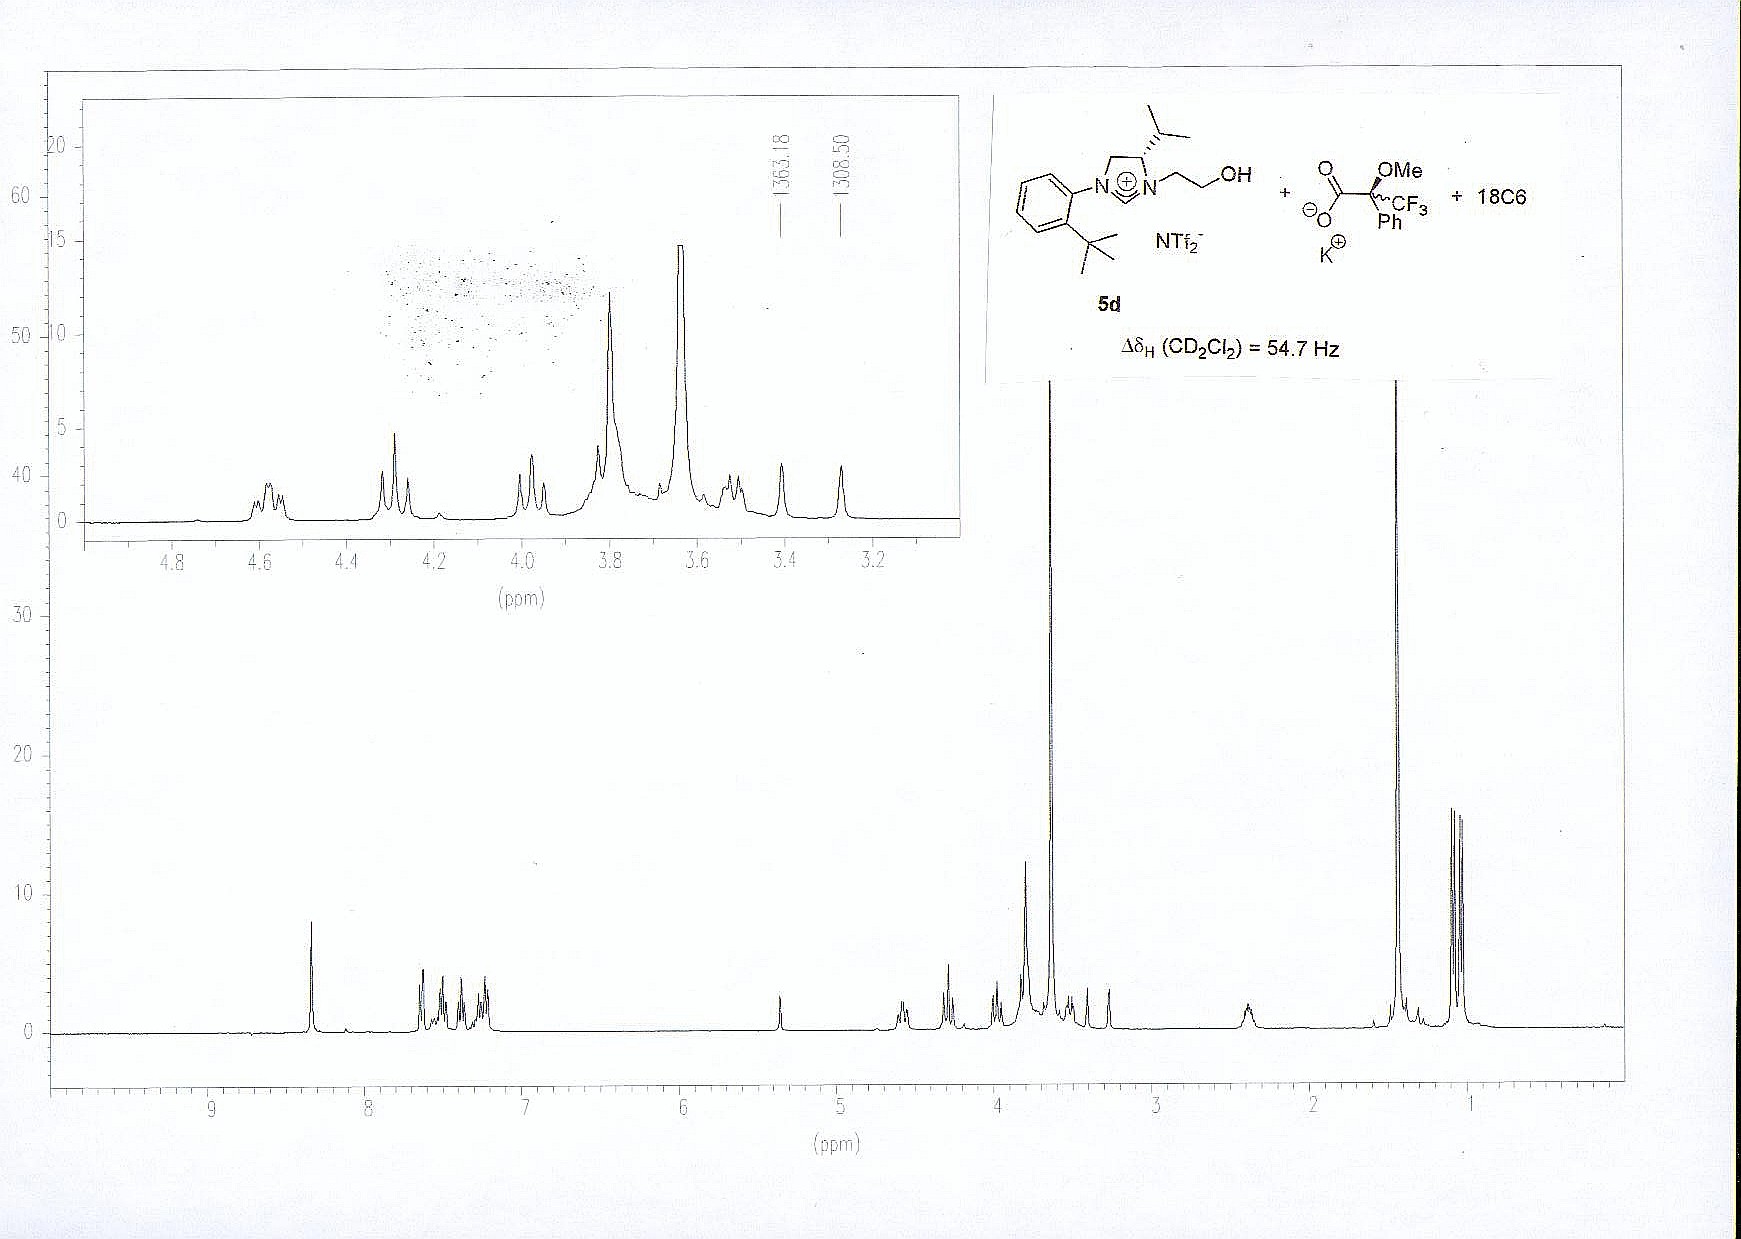


**4c**


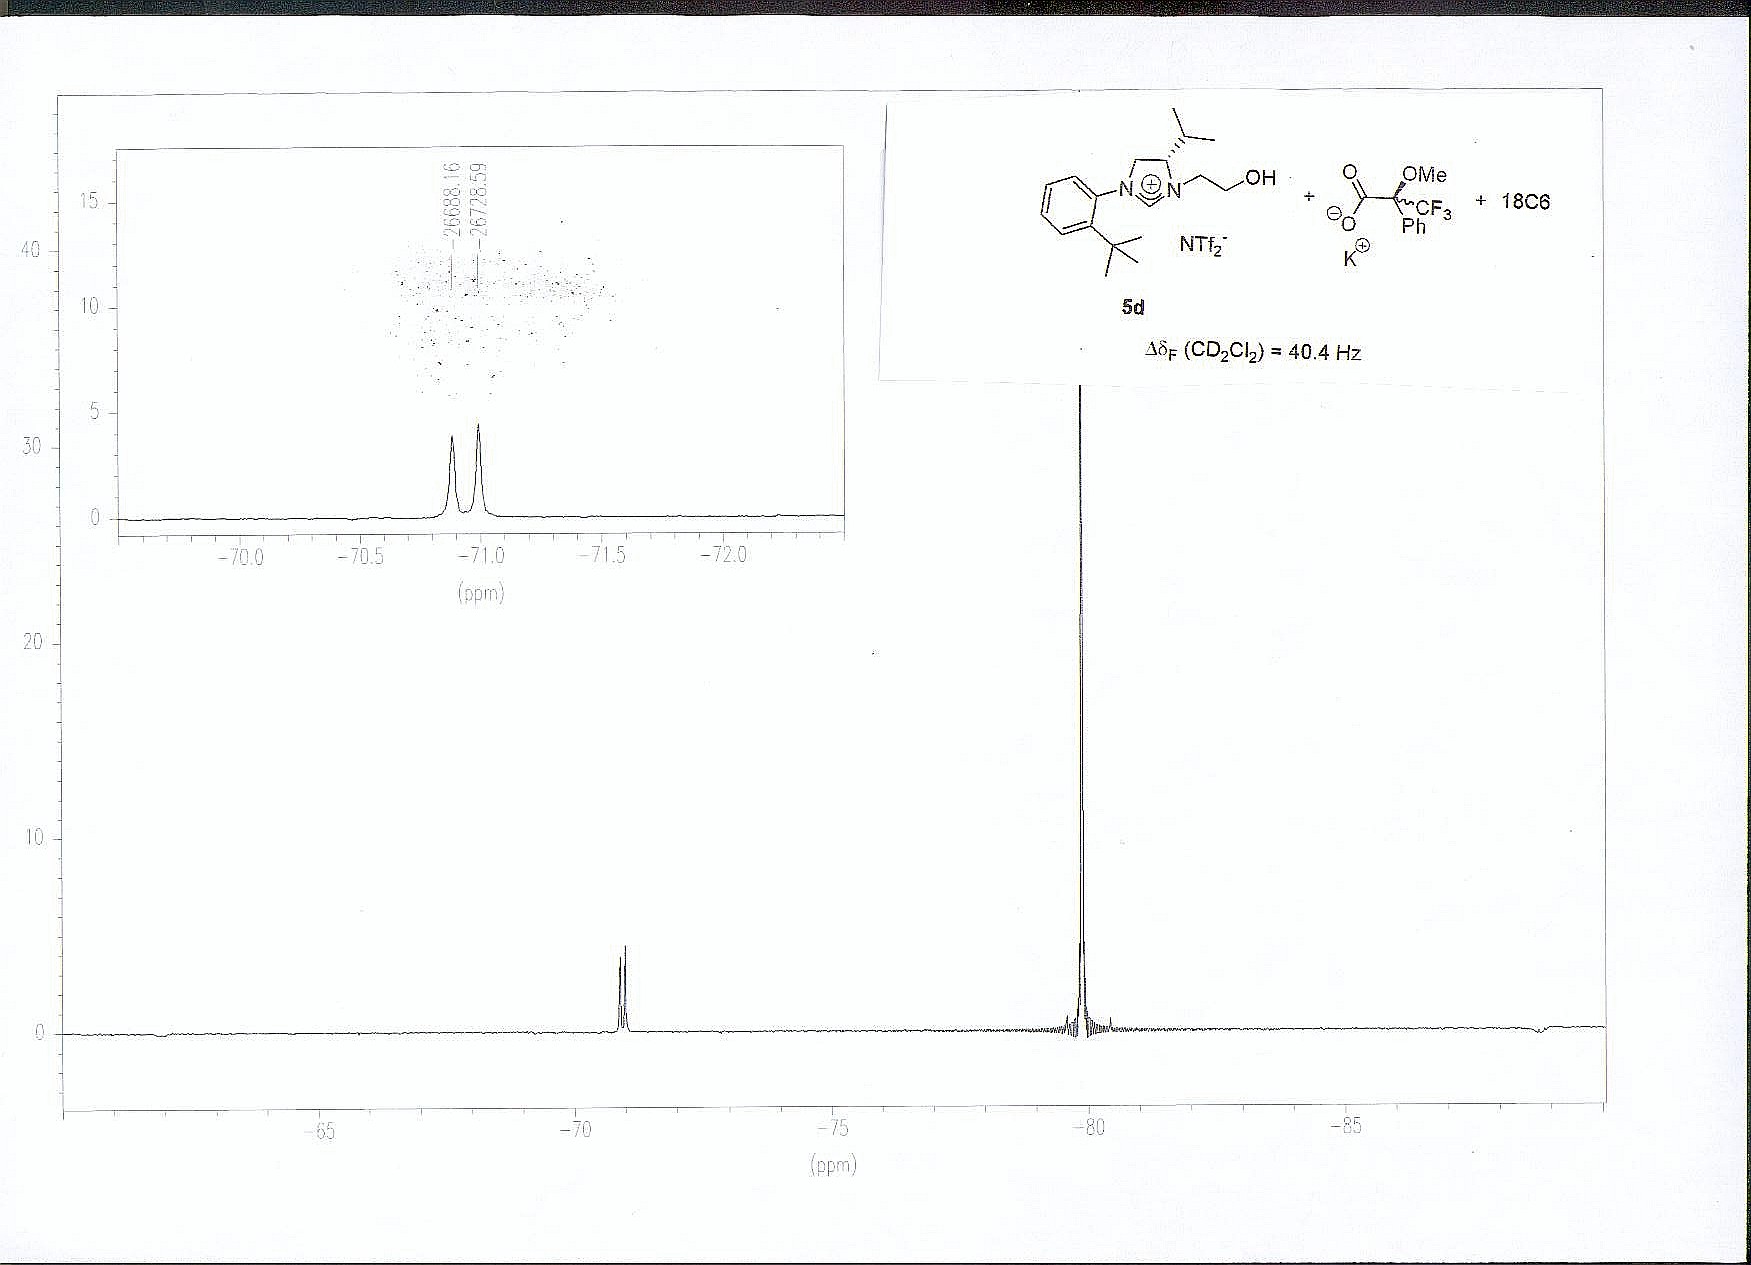


**4c**


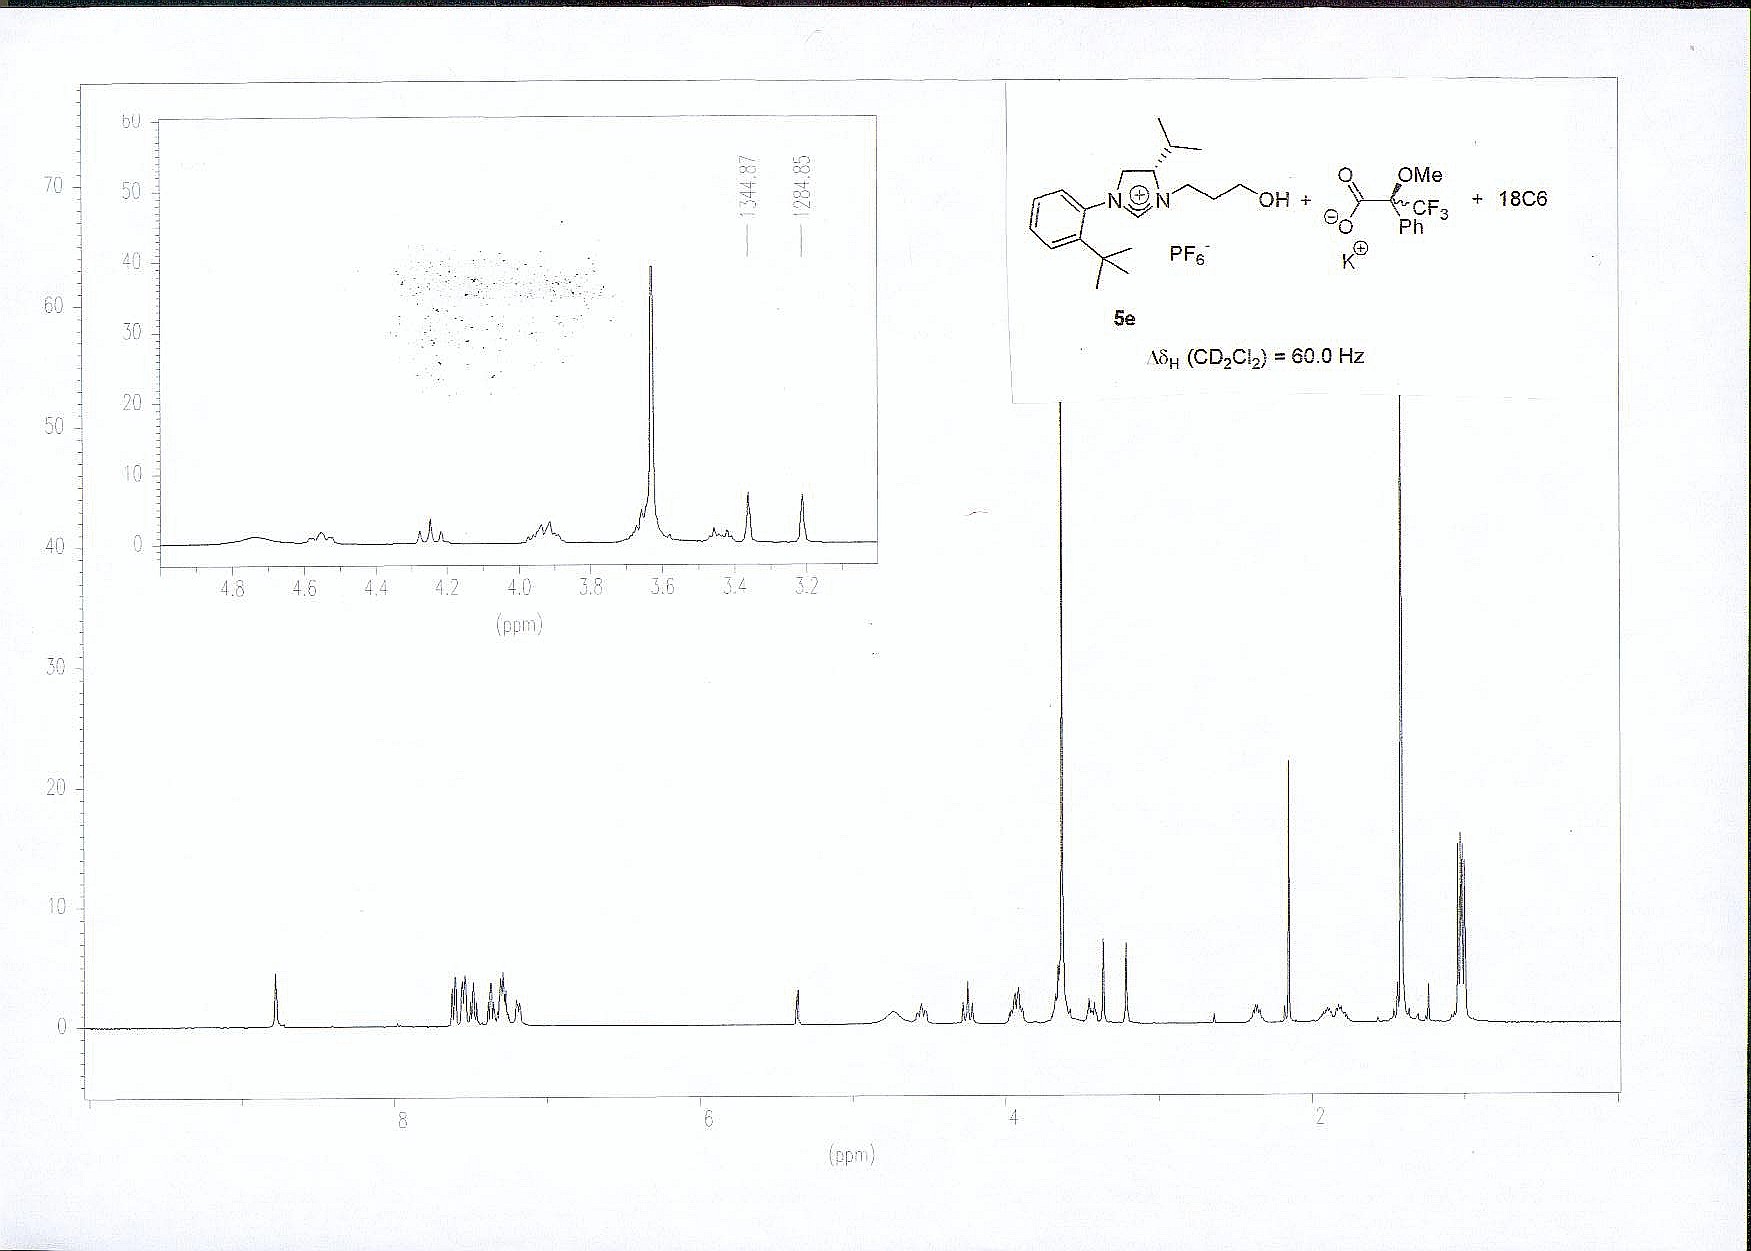


**4d**


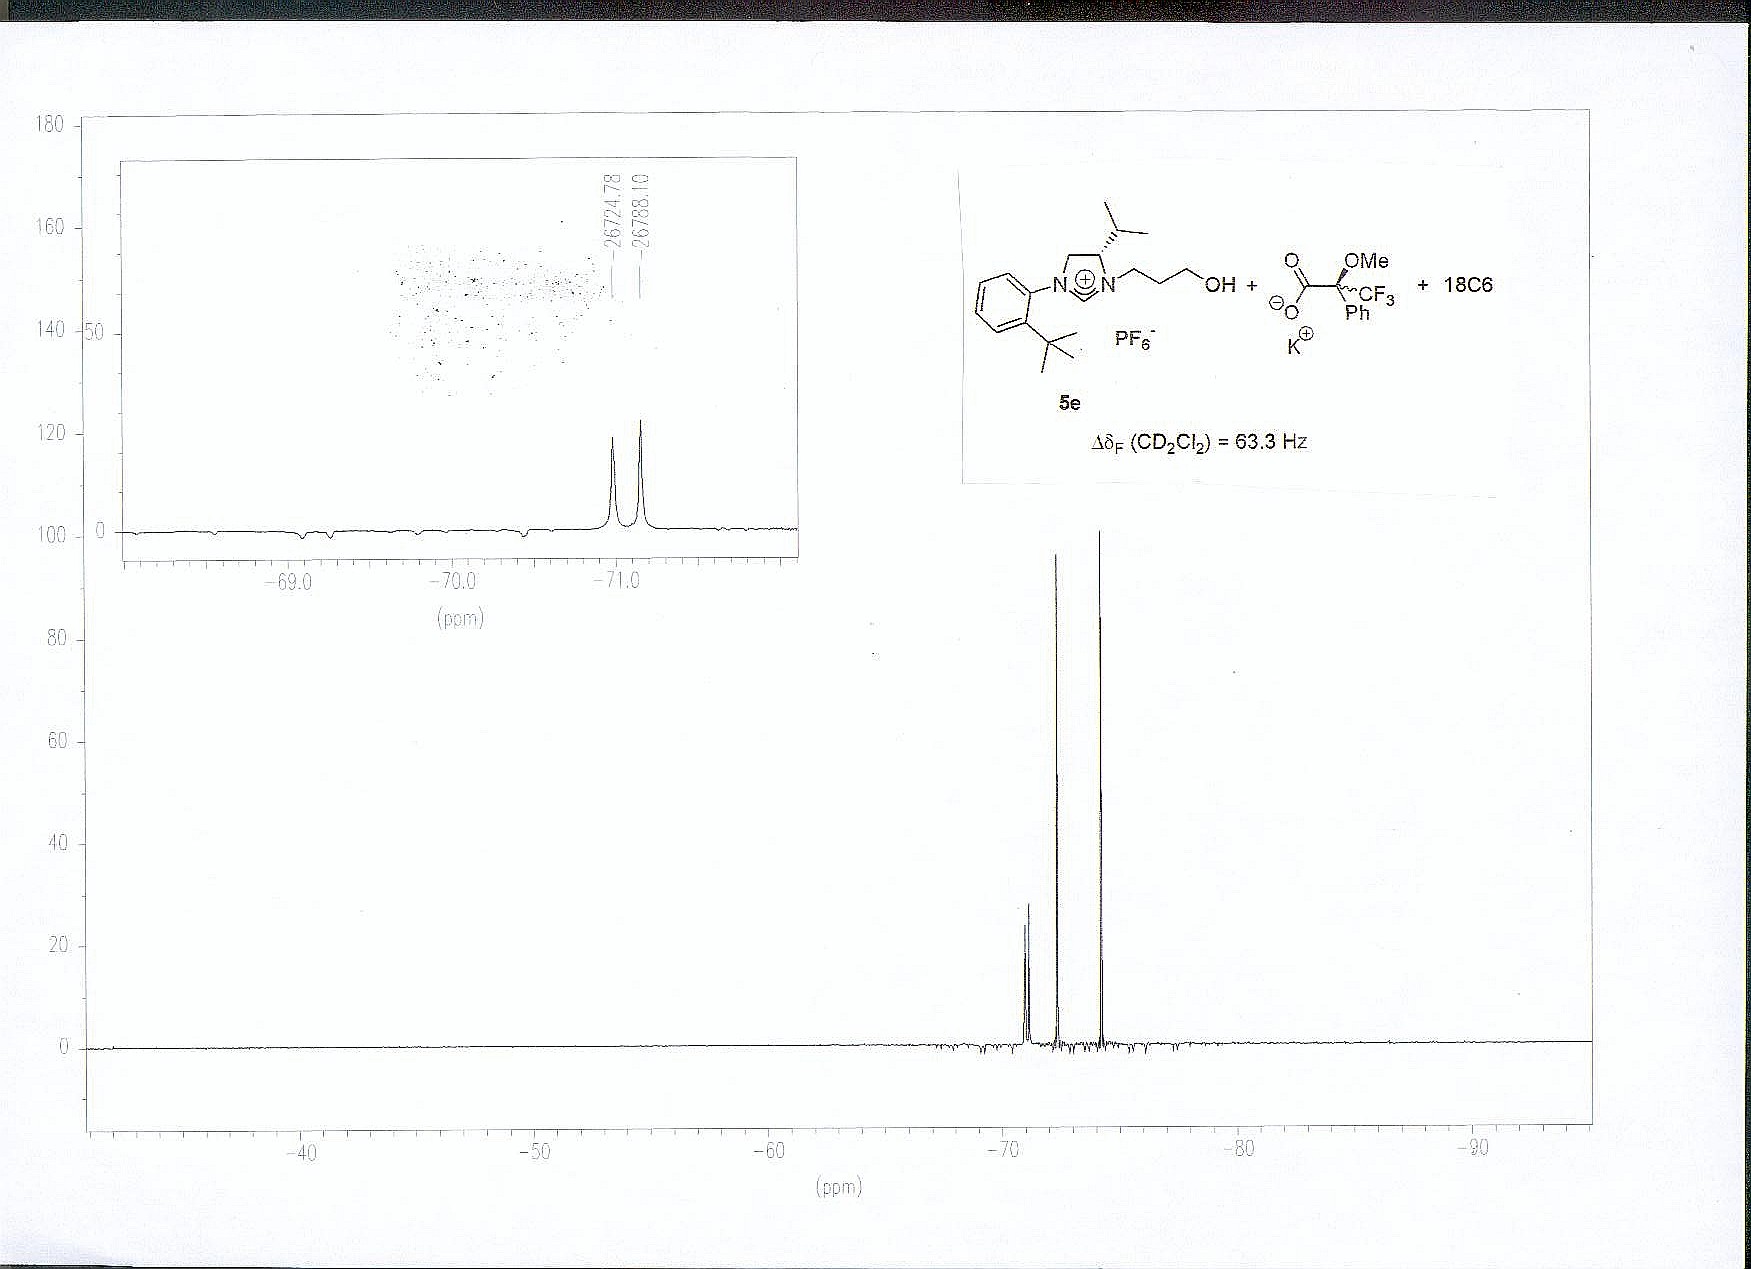


**4d**


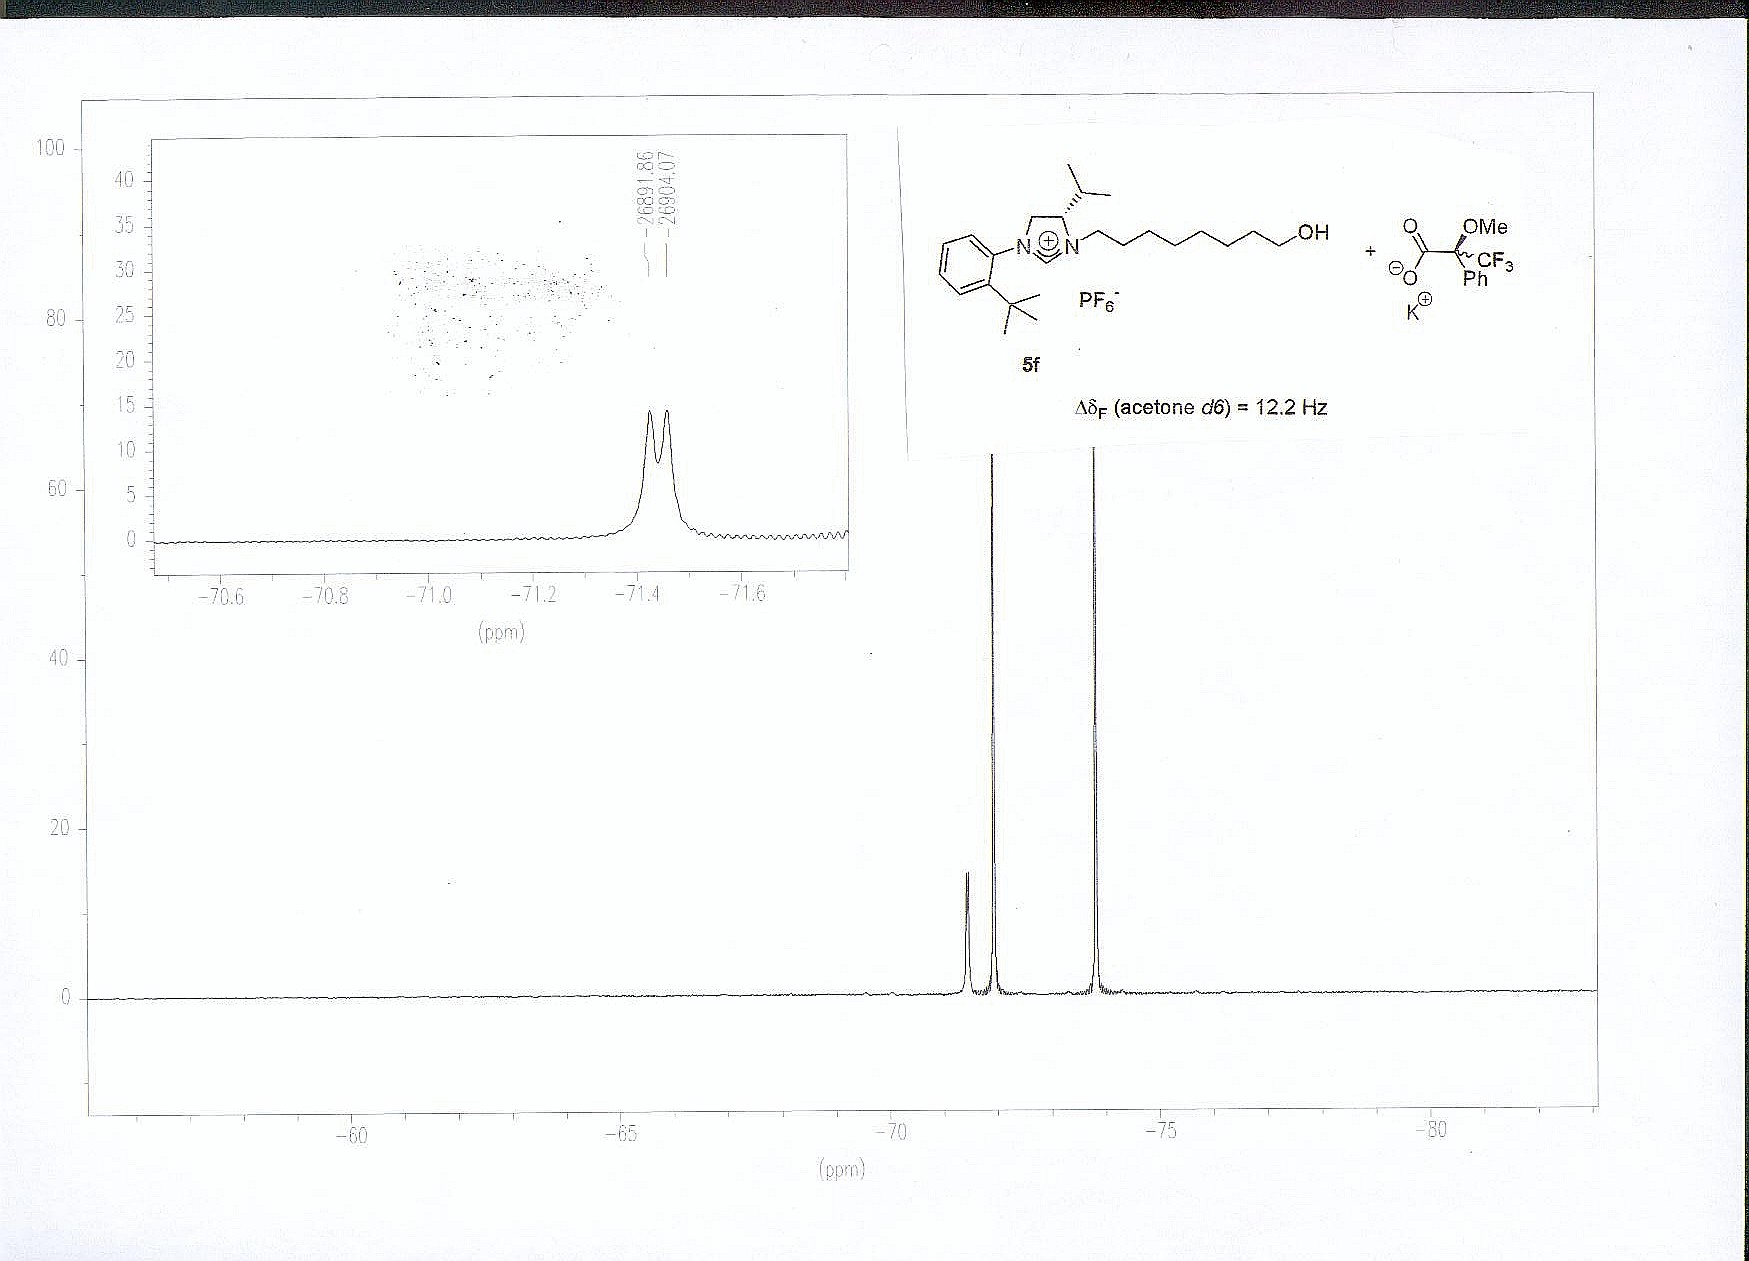


**4e**


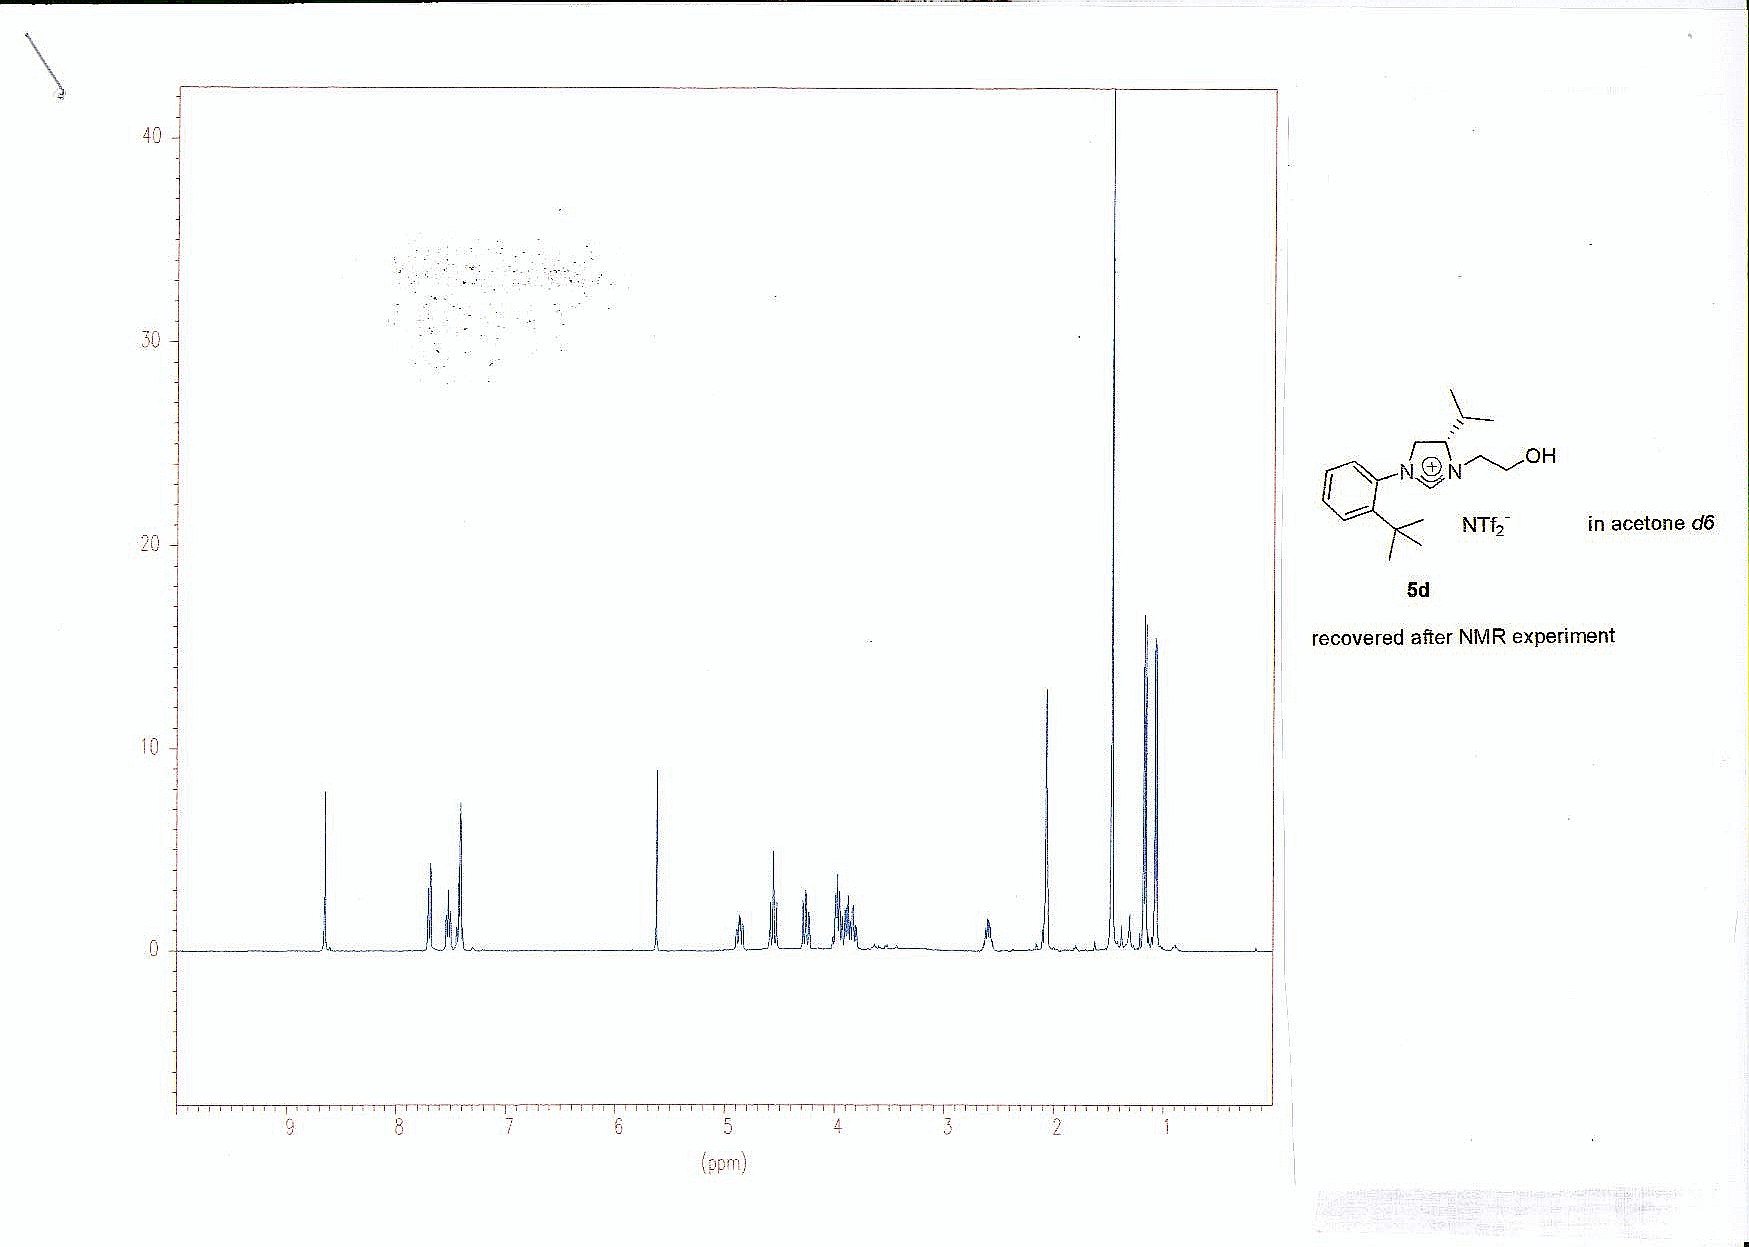


**4c**

**4c**


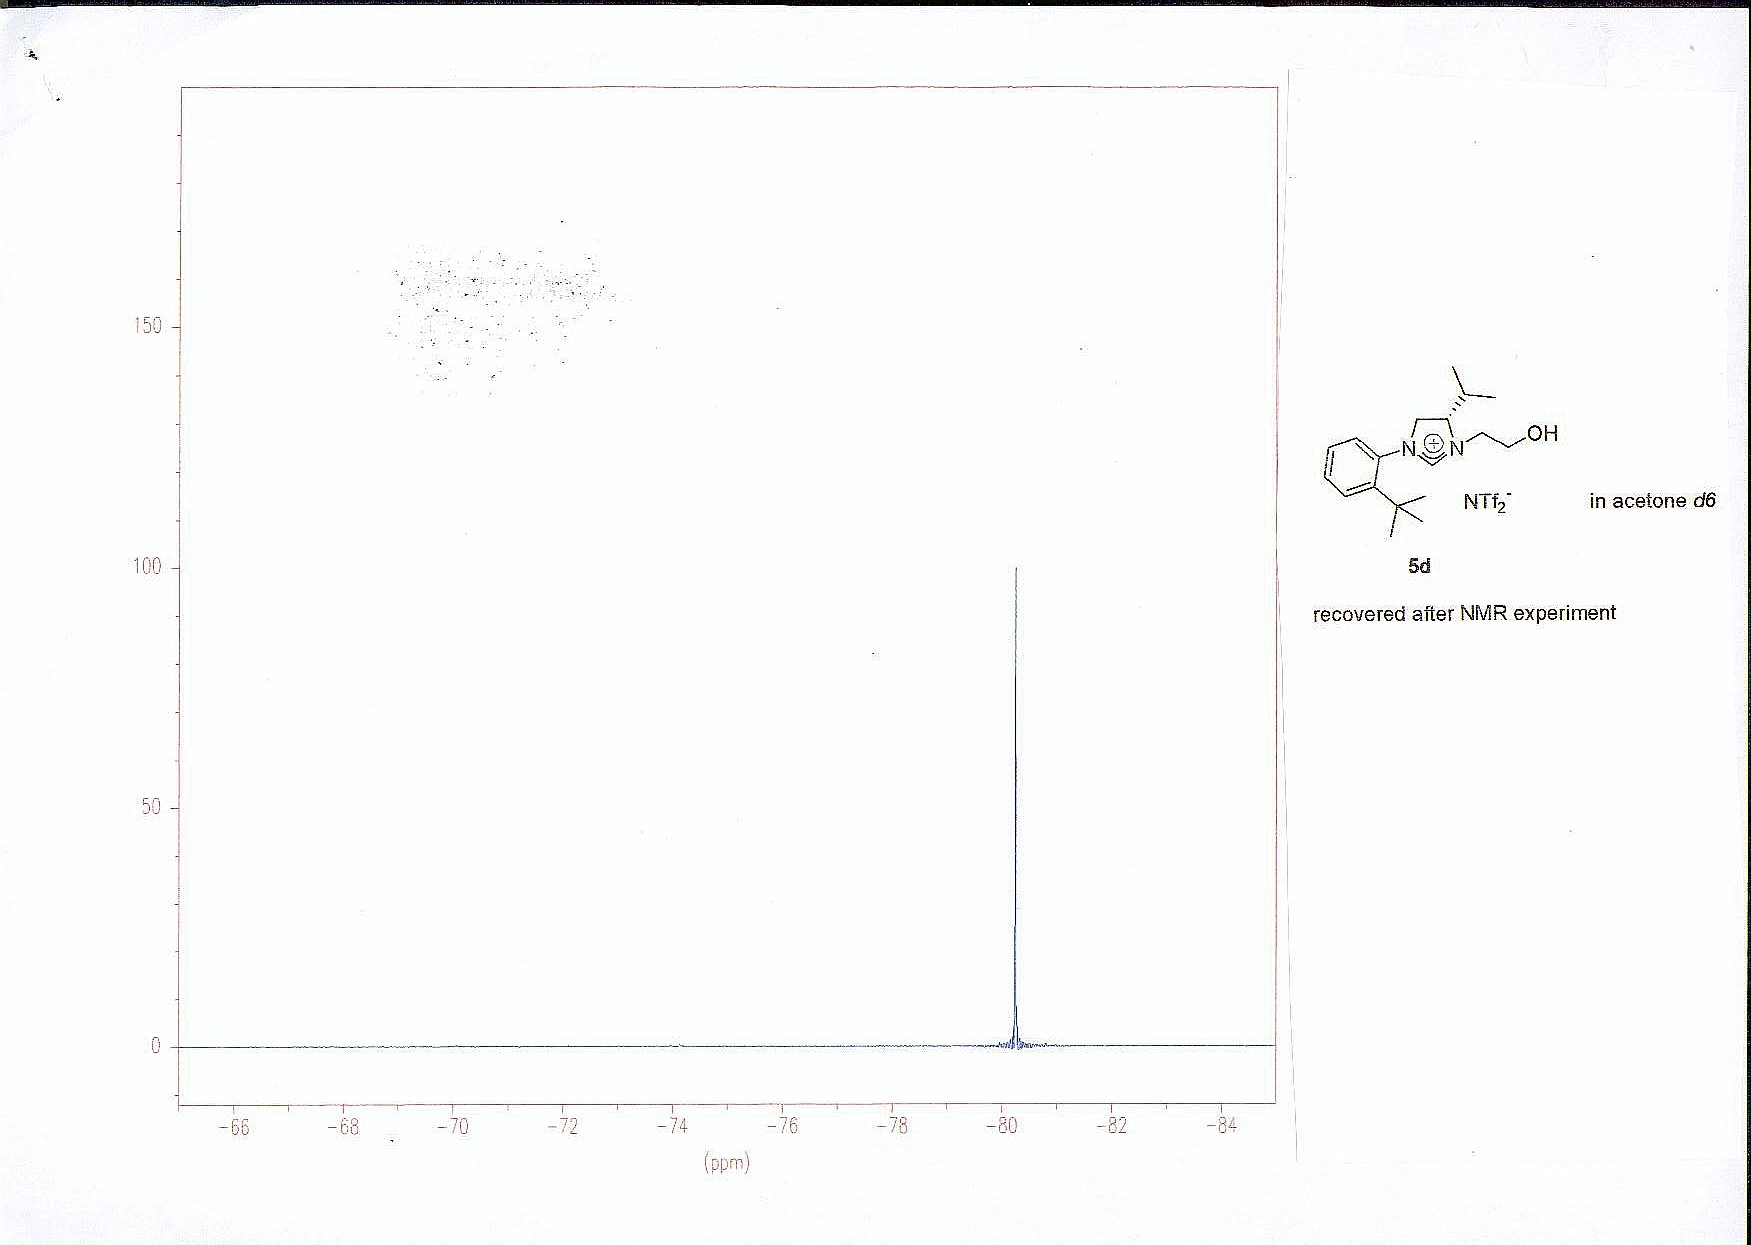


**4c**

**4c**


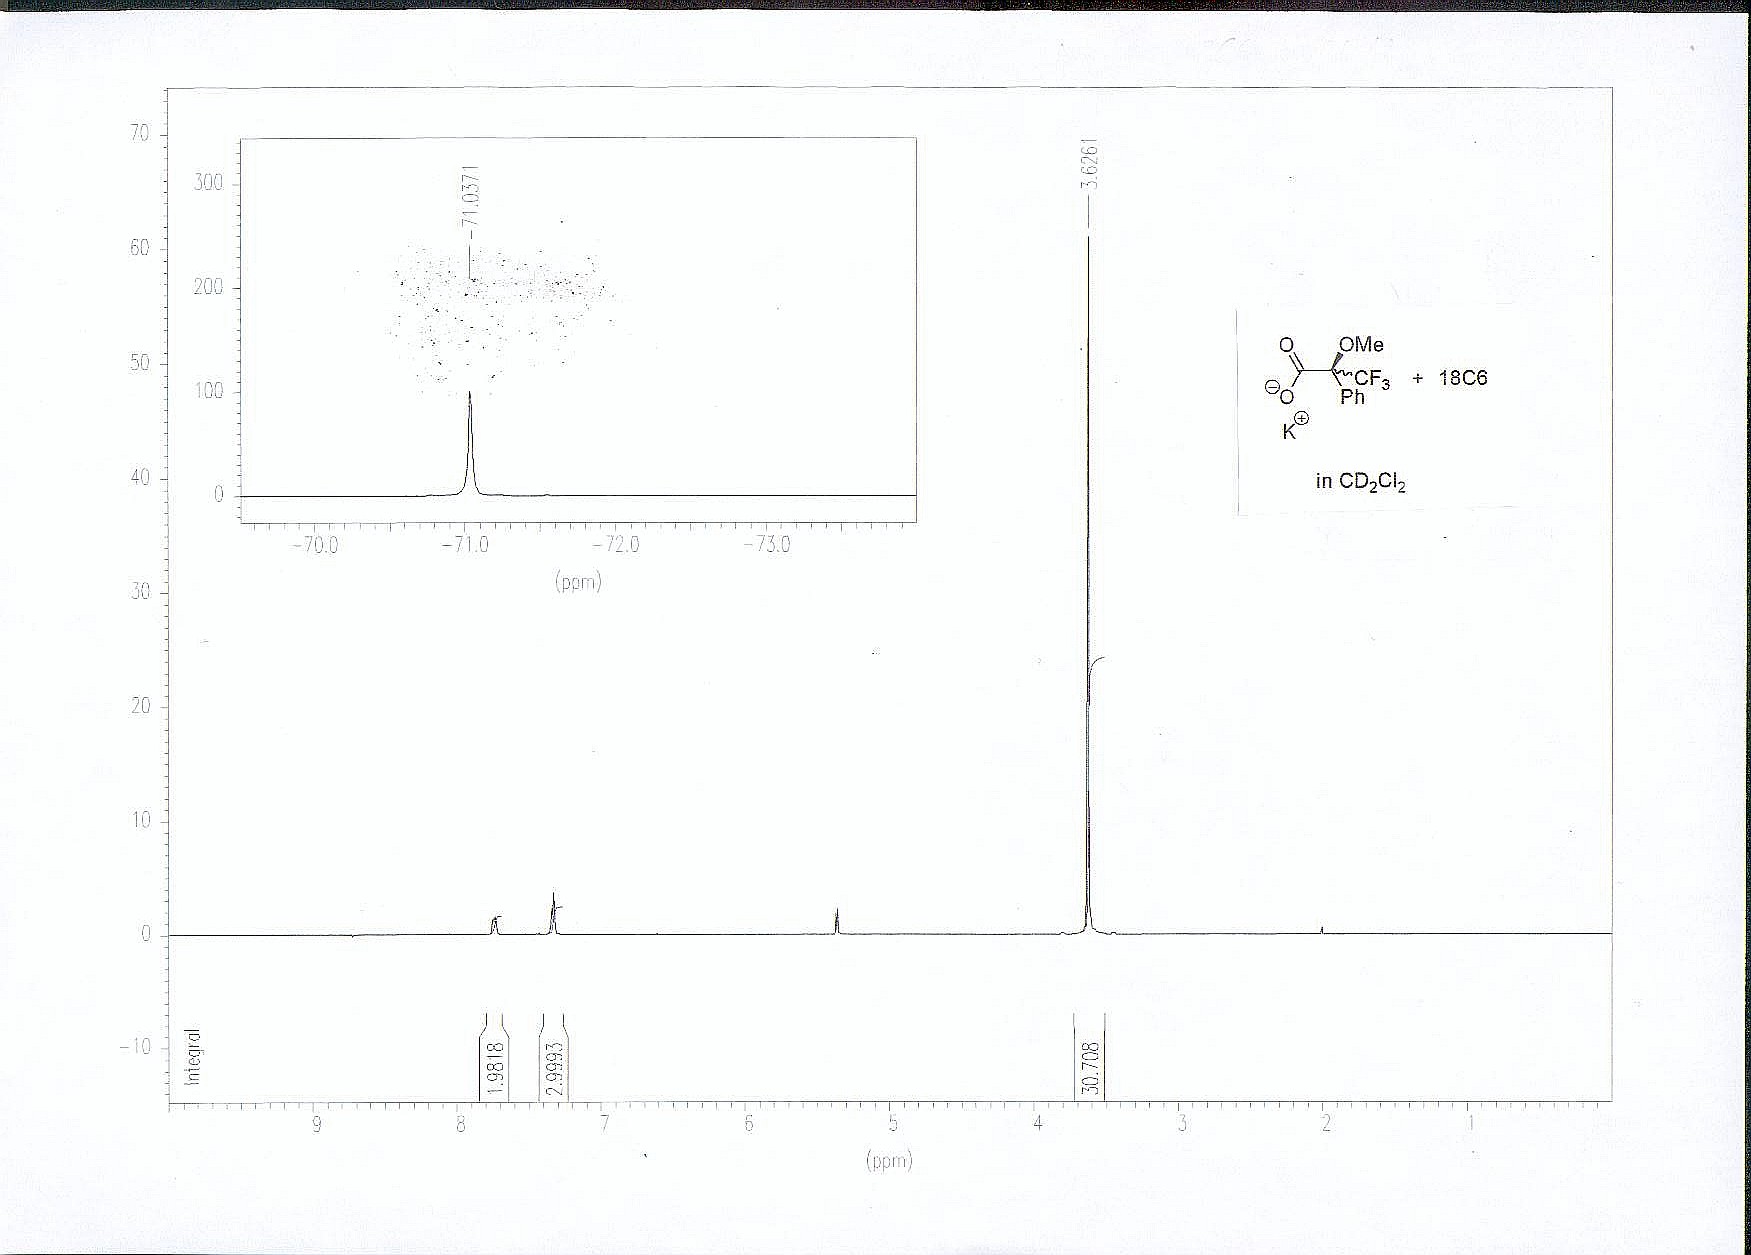


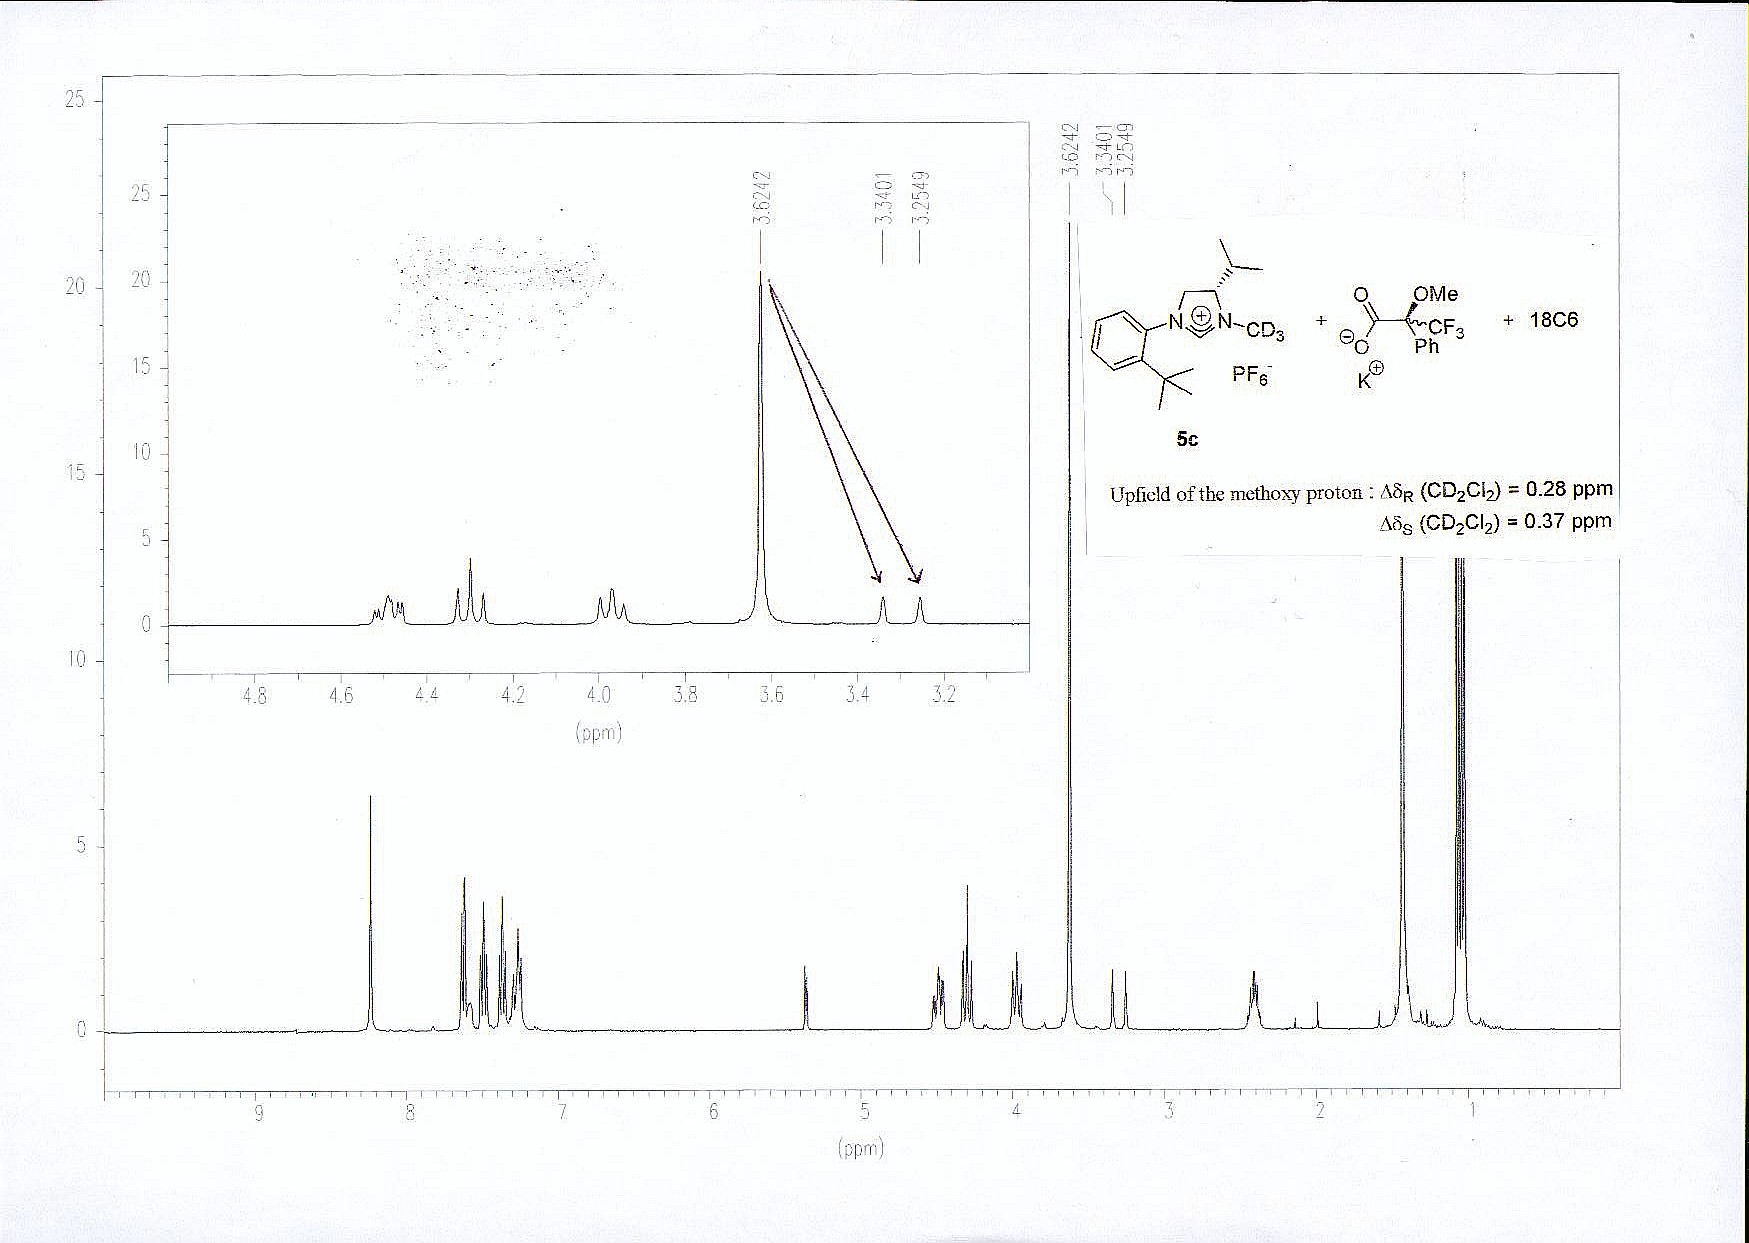


**4a**
